# Supplementary material for: Effects of solvents on the DACBO-catalyzed vinylogous Henry reaction of isatin with 3,5-dimethyl-4-nitroisoxazole “on-water” and in solution from QM/MM MC simulations
Source: Royal Society of Chemistry journal article supplement (doi:10.1039/c9ra00082h), 2019-01-01
Supplement: c9ra00082h1.pdf [file c9ra00082h1.pdf]

## Supporting Information

### **Effects of Solvents on the DACBO-catalyzed vinylogous Henry reaction of isatin with 3,5-dimethyl-4-nitroisoxazole “on water” and in solution from QM/MM MC simulations**

Lian Yang<sup>a</sup>, Jianming Zhao<sup>a</sup>, Xin Yang<sup>b</sup>, Ming Chen<sup>a</sup>, Ying Xue<sup>a,\*</sup>

<sup>a</sup> College of Chemistry,  
Key Lab of Green Chemistry and Technology in Ministry of Education,  
Sichuan University, Chengdu 610064,  
People’s Republic of China

<sup>b</sup> State Key Laboratory of Biotherapy and Cancer Center,  
West China Hospital, Sichuan University,  
and Collaborative Innovation Center of Biotherapy,  
Chengdu 610041,  
People’s Republic of China

## Content:

|                                                                                                                                                                                                                                                                                                                                       |    |
|---------------------------------------------------------------------------------------------------------------------------------------------------------------------------------------------------------------------------------------------------------------------------------------------------------------------------------------|----|
| <b>Fig. S1</b> Illustration of the transition structure of the proton migration process for DACBO-catalyzed vinylogous Henry reactions of isatin with 3,5-dimethyl-4-nitroisoxazole in methanol from QM/MM calculations.....                                                                                                          | S3 |
| <b>Fig. S2</b> Illustration of the transition structure of the proton migration process for DACBO-catalyzed vinylogous Henry reactions of isatin with 3,5-dimethyl-4-nitroisoxazole in THF from QM/MM calculations.....                                                                                                               | S4 |
| <b>Fig. S3</b> DFT calculated free energy profiles of three pathways for the vinylogous Henry reaction of isatin with 3,5-dimethyl-4-nitroisoxazole in water and the corresponding optimized structures. Gibbs free energies are given in kcal mol <sup>-1</sup> .....                                                                | S5 |
| <b>Fig. S4</b> The geometry structures of reactants, transition states, intermediates for the proton migration process (rate-limiting step) in DACBO-catalyzed vinylogous Henry reactions of isatin with 3,5-dimethyl-4-nitroisoxazole by employing microsolvent models with the introducing one-, three- and six-water clusters..... | S7 |
| <b>Fig. S5</b> Computed O(solute)-CH <sub>2</sub> (THF) radial distribution functions for the rate-limiting step of DACBO-catalyzed vinylogous Henry reaction in THF: transition structure (dash red), reactant (solid red) at 25 °C and 1 atm.....                                                                                   | S8 |
| Coordinates of all stationary points.....                                                                                                                                                                                                                                                                                             | S9 |

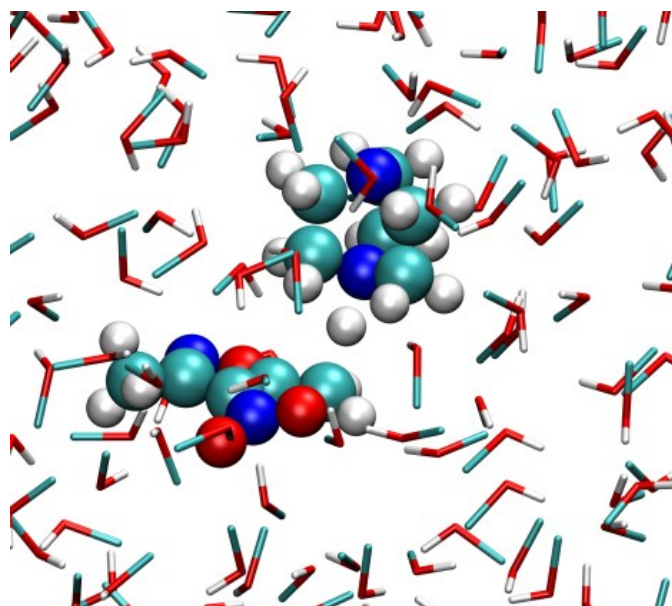

Fig. S1 Illustration of the transition structure of the proton migration process for DACBO-catalyzed vinylogous Henry reactions of isatin with 3,5-dimethyl-4-nitroisoxazole in methanol from QM/MM calculations.

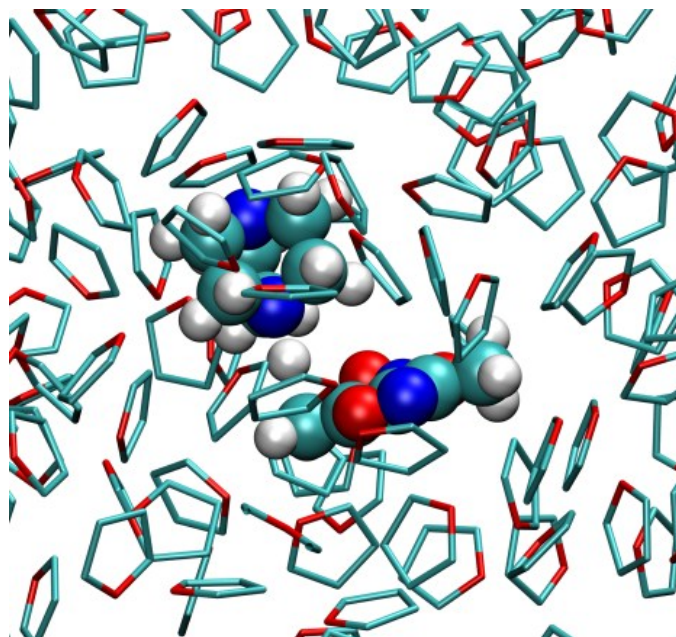

Fig. S2 Illustration of the transition structure of the proton migration process for DACBO-catalyzed vinylogous Henry reactions of isatin with 3,5-dimethyl-4-nitroisoxazole in THF from QM/MM calculations.

Path A

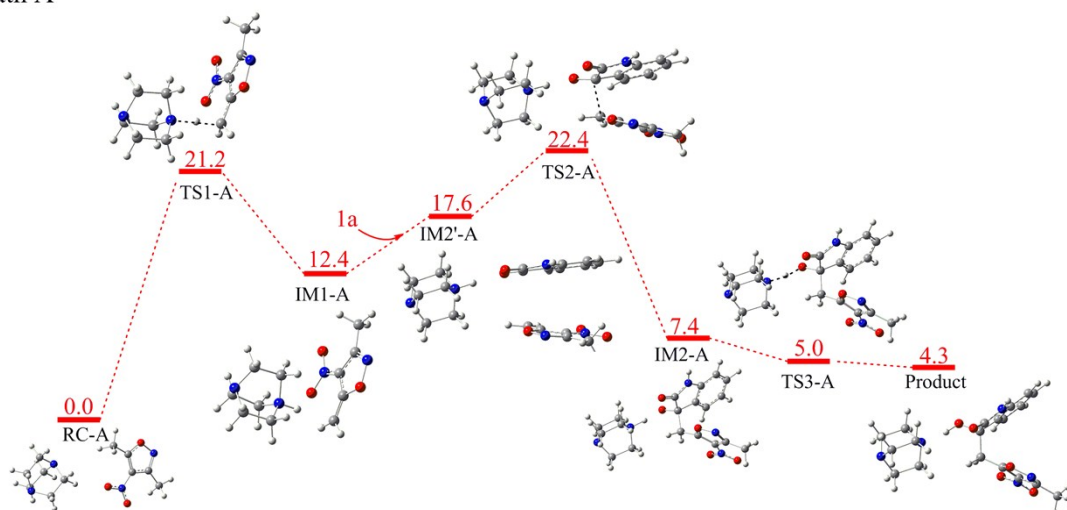

Path B

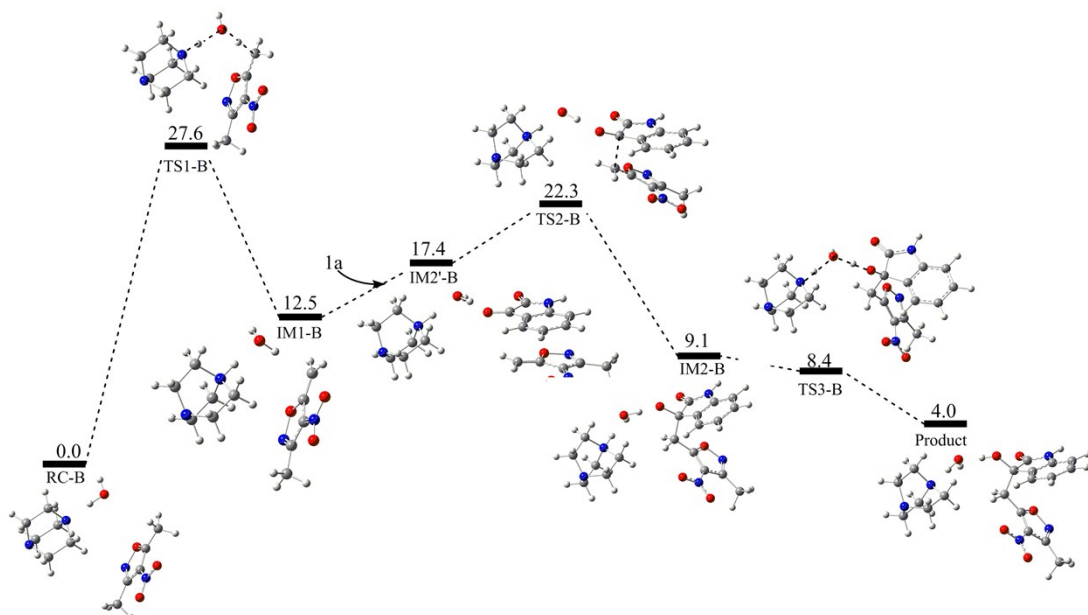

Path C

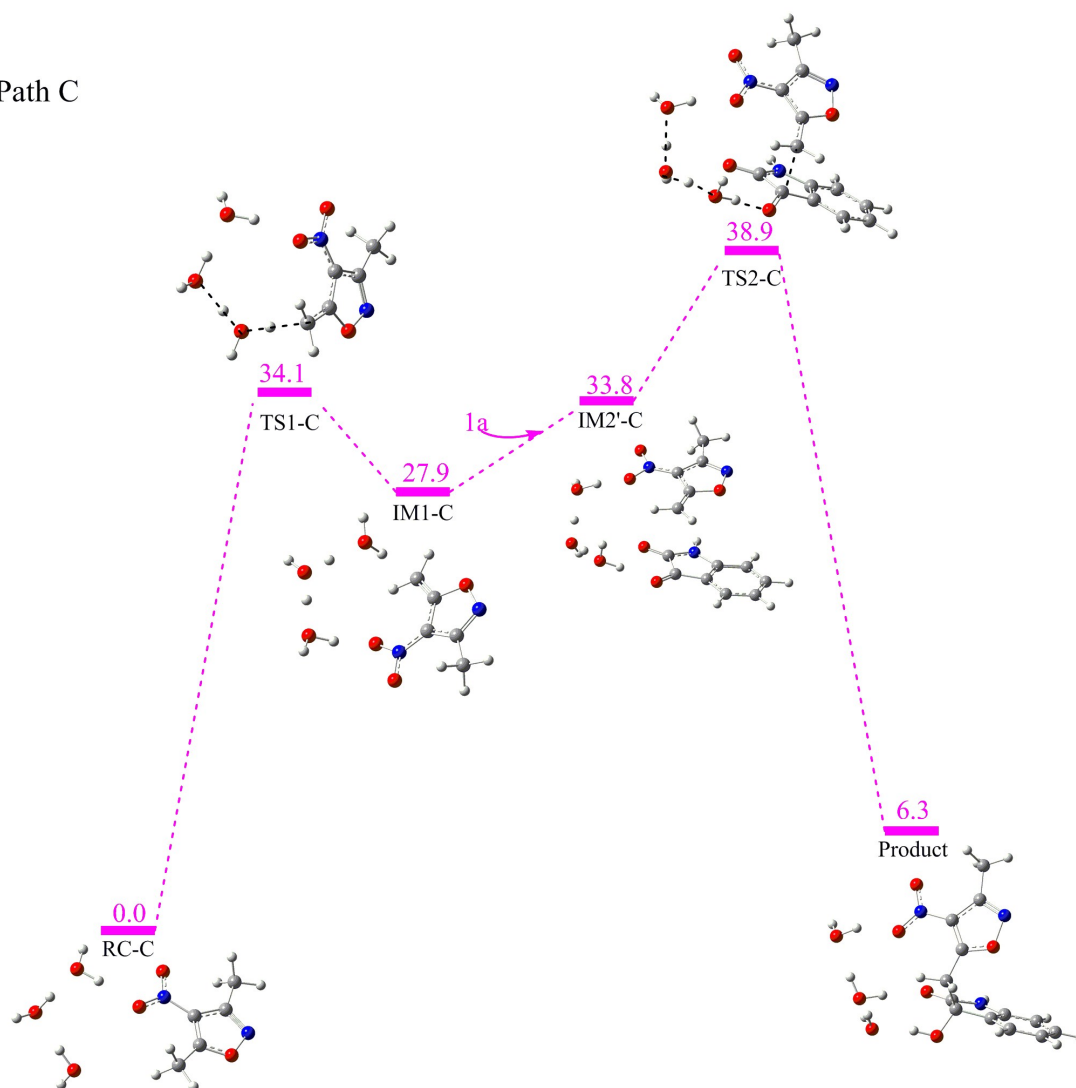

Fig. S3 DFT calculated free energy profiles of three pathways for the vinylogous Henry reaction of isatin with 3,5-dimethyl-4-nitroisoxazole in water and the corresponding optimized structures. Gibbs free energies are given in  $\text{kcal mol}^{-1}$ .

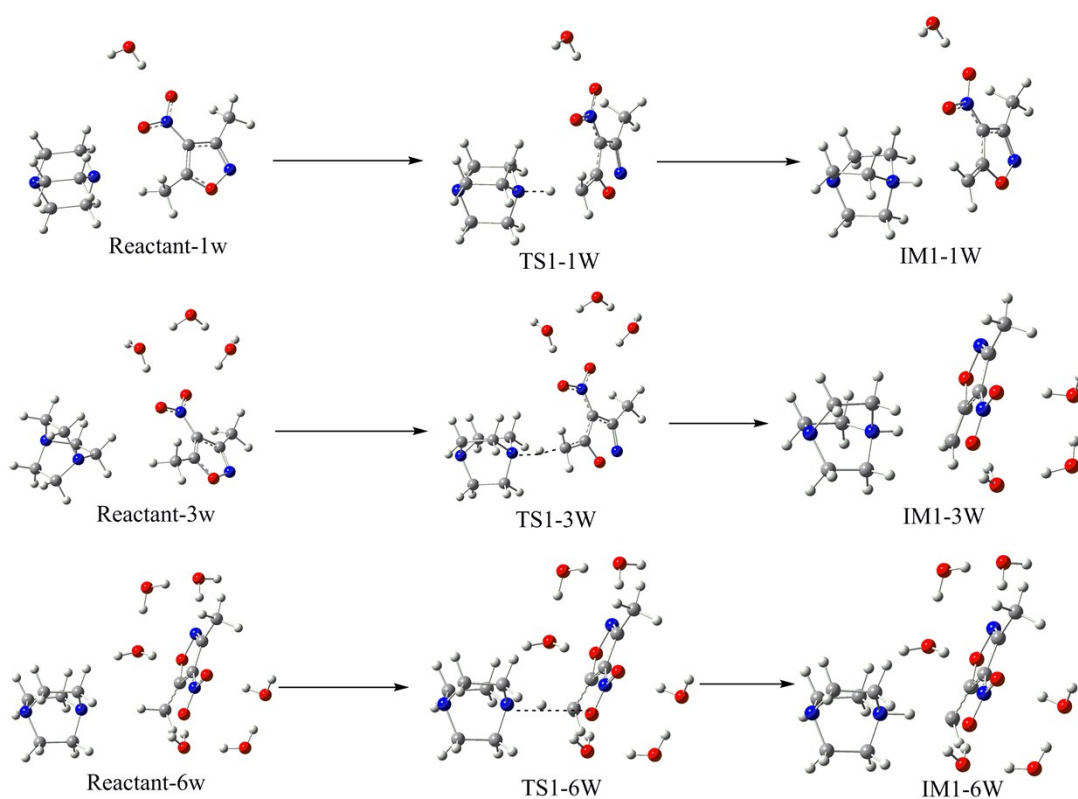

Fig. S4 The geometry structures of reactant, transition, intermediate for the proton migration process (rate-limiting step) in DACBO-catalyzed vinylogous Henry reactions of isatin with 3,5-dimethyl-4-nitroisoxazole by employing microsolvent models with the introducing one-, three- and six-water clusters.

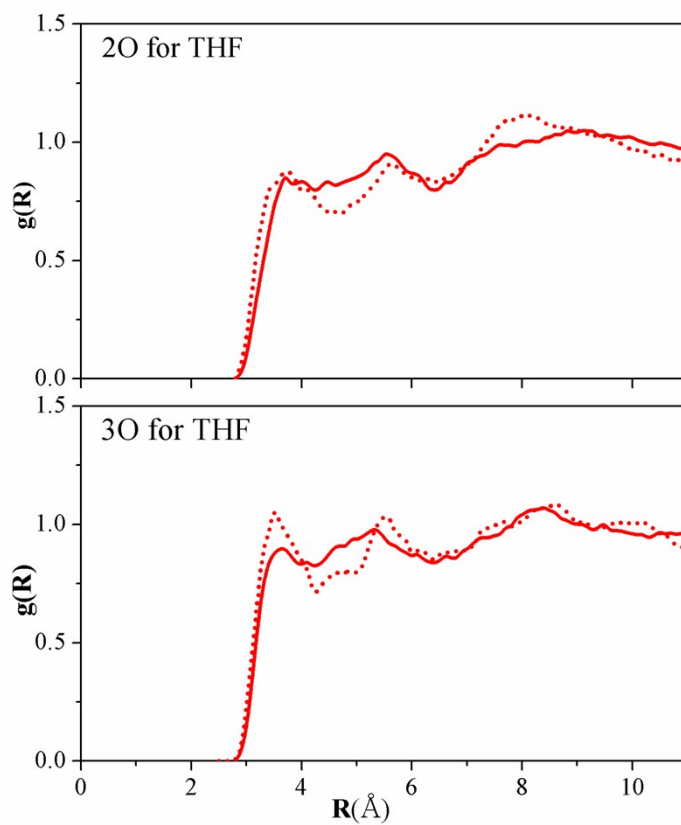

Fig. S5 Computed O(solute)-CH<sub>2</sub>(THF) radial distribution functions for the rate-limiting step of DACBO-catalyzed vinylogous Henry reaction in THF: transition structure (dash red), reactants (solid red) at 25 °C and 1 atm.



## Coordinates of all stationary points:

DABCO catalyzes directly the vinylogous Henry reaction of **1a** and **2** in water (Path A).

### DABCO

|                                              |             |
|----------------------------------------------|-------------|
| Sum of electronic and zero-point Energies=   | -345.177467 |
| Sum of electronic and thermal Energies=      | -345.171095 |
| Sum of electronic and thermal Enthalpies=    | -345.170150 |
| Sum of electronic and thermal Free Energies= | -345.207942 |

|   |             |             |            |
|---|-------------|-------------|------------|
| N | 0.00000000  | 0.00000000  | 0.00000000 |
| N | 0.00000000  | 0.00000000  | 2.62398859 |
| C | 1.38183719  | 0.00000000  | 0.53481518 |
| C | 1.38013416  | -0.10564268 | 2.08863911 |
| H | 1.92212469  | -0.84086029 | 0.08680746 |
| H | 1.87127720  | 0.92327368  | 0.21155942 |
| H | 1.80302223  | -1.05888849 | 2.41963610 |
| H | 1.98344632  | 0.68882219  | 2.54085485 |
| C | -0.70078441 | -1.18937450 | 0.53828103 |
| H | -1.70815970 | -1.20820714 | 0.10882544 |
| H | -0.17687755 | -2.08428390 | 0.18980601 |
| C | -0.77595093 | -1.14709417 | 2.09383580 |
| H | -1.81006484 | -1.05279622 | 2.43797609 |
| H | -0.36373653 | -2.06426672 | 2.52774054 |
| C | -0.67207450 | 1.20809022  | 0.53078384 |
| C | -0.60282377 | 1.24685134  | 2.09012744 |
| H | -1.60467075 | 1.34779239  | 2.52073561 |
| H | -0.00431654 | 2.09378134  | 2.43828175 |
| H | -1.70828157 | 1.20989390  | 0.17961811 |
| H | -0.17373395 | 2.08368059  | 0.10163429 |

### 2

|                                              |             |
|----------------------------------------------|-------------|
| Sum of electronic and zero-point Energies=   | -529.102237 |
| Sum of electronic and thermal Energies=      | -529.093011 |
| Sum of electronic and thermal Enthalpies=    | -529.092067 |
| Sum of electronic and thermal Free Energies= | -529.136857 |

|   |          |          |          |
|---|----------|----------|----------|
| C | -1.1401  | -0.74977 | -0.00001 |
| C | -0.00421 | 0.12669  | -0.00002 |
| C | 1.10736  | -0.68684 | -0.00001 |
| N | -0.73668 | -1.99708 | 0.       |
| O | 0.6827   | -1.95143 | -0.00001 |
| N | 0.00333  | 1.55427  | -0.00001 |

|   |          |          |          |
|---|----------|----------|----------|
| C | -2.60007 | -0.43309 | 0.00001  |
| C | 2.57333  | -0.45079 | 0.00003  |
| H | -2.86421 | 0.16093  | -0.87895 |
| H | -3.17095 | -1.36358 | -0.00001 |
| H | -2.86418 | 0.16087  | 0.87901  |
| H | 2.86434  | 0.13265  | 0.87821  |
| H | 3.09862  | -1.40764 | -0.00025 |
| H | 2.8643   | 0.1332   | -0.8778  |
| O | -1.08712 | 2.13461  | 0.00003  |
| O | 1.10288  | 2.12258  | -0.00003 |

**1a**

|                                              |             |
|----------------------------------------------|-------------|
| Sum of electronic and zero-point Energies=   | -512.999847 |
| Sum of electronic and thermal Energies=      | -512.991865 |
| Sum of electronic and thermal Enthalpies=    | -512.990921 |
| Sum of electronic and thermal Free Energies= | -513.032854 |

|   |          |          |          |
|---|----------|----------|----------|
| C | 0.37222  | 0.6128   | 0.00001  |
| C | 0.53358  | -0.78891 | 0.       |
| C | 1.80399  | -1.36632 | 0.00001  |
| C | 2.91661  | -0.51984 | 0.00002  |
| C | 2.74089  | 0.87107  | 0.00003  |
| C | 1.46614  | 1.46382  | 0.00002  |
| C | -1.7784  | -0.1508  | 0.       |
| C | -0.80129 | -1.36911 | -0.00001 |
| H | 1.91658  | -2.44603 | 0.       |
| H | 3.91824  | -0.93644 | 0.00002  |
| H | 3.61436  | 1.51628  | 0.00004  |
| H | 1.35321  | 2.5419   | 0.00004  |
| N | -1.00073 | 0.96565  | -0.00001 |
| O | -1.18285 | -2.53131 | -0.00002 |
| O | -3.00603 | -0.22104 | 0.00001  |
| H | -1.33736 | 1.90728  | -0.00003 |

**TS1-A**

|                                              |             |
|----------------------------------------------|-------------|
| Sum of electronic and zero-point Energies=   | -874.275212 |
| Sum of electronic and thermal Energies=      | -874.258843 |
| Sum of electronic and thermal Enthalpies=    | -874.257899 |
| Sum of electronic and thermal Free Energies= | -874.320613 |

|   |         |          |          |
|---|---------|----------|----------|
| C | 3.18492 | -0.7269  | 0.56278  |
| C | 2.36789 | 0.13046  | -0.25099 |
| C | 1.54269 | -0.71313 | -1.02733 |
| N | 2.90286 | -1.98037 | 0.32932  |

|   |          |          |          |
|---|----------|----------|----------|
| O | 1.87142  | -1.98363 | -0.67757 |
| N | 2.35203  | 1.51121  | -0.26345 |
| C | 4.2328   | -0.3768  | 1.56435  |
| C | 0.48012  | -0.51468 | -1.93414 |
| H | 3.81006  | 0.24125  | 2.3613   |
| H | 4.6469   | -1.2893  | 1.99859  |
| H | 5.03686  | 0.19511  | 1.09277  |
| H | 0.255    | -1.39398 | -2.53978 |
| H | -0.64623 | -0.337   | -1.19483 |
| H | 0.53038  | 0.41665  | -2.49369 |
| O | 3.1428   | 2.14904  | 0.48138  |
| O | 1.53642  | 2.1085   | -1.01474 |
| C | -1.47598 | -0.60467 | 0.93127  |
| C | -2.76625 | -0.451   | 1.78735  |
| H | -1.13566 | -1.64269 | 0.88673  |
| H | -0.6564  | 0.01199  | 1.30946  |
| H | -3.11413 | -1.42664 | 2.13638  |
| H | -2.57129 | 0.1701   | 2.66547  |
| C | -2.89303 | -0.95502 | -1.01521 |
| H | -3.03767 | -0.65014 | -2.05498 |
| H | -2.59472 | -2.00655 | -1.00231 |
| C | -4.1615  | -0.70127 | -0.15017 |
| H | -4.94213 | -0.22077 | -0.74556 |
| H | -4.56079 | -1.64602 | 0.22751  |
| C | -3.36656 | 1.47498  | 0.48713  |
| H | -4.18242 | 1.96158  | -0.05349 |
| H | -3.10768 | 2.10415  | 1.34268  |
| C | -2.13468 | 1.28158  | -0.44651 |
| H | -2.35389 | 1.57585  | -1.47626 |
| H | -1.2633  | 1.84685  | -0.10416 |
| N | -1.76968 | -0.15797 | -0.45662 |
| N | -3.85385 | 0.17526  | 1.00225  |

#### IM1-A

|                                              |             |
|----------------------------------------------|-------------|
| Sum of electronic and zero-point Energies=   | -874.284935 |
| Sum of electronic and thermal Energies=      | -874.267814 |
| Sum of electronic and thermal Enthalpies=    | -874.266869 |
| Sum of electronic and thermal Free Energies= | -874.332592 |

|   |         |          |          |
|---|---------|----------|----------|
| C | 3.12738 | -0.73114 | 0.55627  |
| C | 2.29776 | 0.13282  | -0.24201 |
| C | 1.47112 | -0.7273  | -1.04766 |
| N | 2.8615  | -1.98482 | 0.31809  |
| O | 1.82324 | -2.01932 | -0.67981 |

|   |          |          |          |
|---|----------|----------|----------|
| N | 2.2711   | 1.48646  | -0.24322 |
| C | 4.17757  | -0.3789  | 1.55666  |
| C | 0.51466  | -0.54086 | -1.99322 |
| H | 3.75299  | 0.22552  | 2.36307  |
| H | 4.60466  | -1.2914  | 1.97887  |
| H | 4.97345  | 0.20759  | 1.0892   |
| H | 0.09037  | -1.40336 | -2.49792 |
| H | -1.00551 | -0.31055 | -0.97578 |
| H | 0.30813  | 0.4523   | -2.36644 |
| O | 3.06545  | 2.15621  | 0.50187  |
| O | 1.43687  | 2.09597  | -0.99384 |
| C | -1.57958 | -0.62232 | 0.99084  |
| C | -2.88308 | -0.45305 | 1.80954  |
| H | -1.24624 | -1.65953 | 0.93134  |
| H | -0.75998 | -0.00495 | 1.36235  |
| H | -3.24147 | -1.42461 | 2.15623  |
| H | -2.69756 | 0.17149  | 2.68585  |
| C | -2.98696 | -0.97215 | -1.00639 |
| H | -3.0988  | -0.65322 | -2.04387 |
| H | -2.67517 | -2.01761 | -0.98554 |
| C | -4.2525  | -0.70478 | -0.15238 |
| H | -5.02314 | -0.22383 | -0.75843 |
| H | -4.65696 | -1.64617 | 0.22511  |
| C | -3.45994 | 1.47511  | 0.48865  |
| H | -4.26595 | 1.9544   | -0.07079 |
| H | -3.21707 | 2.10928  | 1.34386  |
| C | -2.21531 | 1.29426  | -0.41881 |
| H | -2.4029  | 1.57508  | -1.45648 |
| H | -1.33921 | 1.8341   | -0.05563 |
| N | -1.87168 | -0.16596 | -0.40894 |
| N | -3.94992 | 0.17508  | 0.99839  |

#### IM1'-A

|                                              |              |
|----------------------------------------------|--------------|
| Sum of electronic and zero-point Energies=   | -1387.286028 |
| Sum of electronic and thermal Energies=      | -1387.258944 |
| Sum of electronic and thermal Enthalpies=    | -1387.258000 |
| Sum of electronic and thermal Free Energies= | -1387.347797 |

|   |         |          |          |
|---|---------|----------|----------|
| C | 3.11105 | -2.72463 | 0.25731  |
| C | 2.7388  | -1.66678 | -0.64525 |
| C | 1.29847 | -1.59754 | -0.61819 |
| N | 2.05901 | -3.26175 | 0.80885  |
| O | 0.9041  | -2.58056 | 0.28954  |
| N | 3.55826 | -0.89122 | -1.39087 |

|   |          |          |          |
|---|----------|----------|----------|
| C | 4.46756  | -3.23781 | 0.6105   |
| C | 0.36053  | -0.83923 | -1.23062 |
| H | 5.083    | -2.44019 | 1.03592  |
| H | 4.37741  | -4.04727 | 1.33863  |
| H | 4.9822   | -3.61177 | -0.27886 |
| H | -0.69015 | -1.02273 | -1.03679 |
| H | 0.64866  | -0.08852 | -1.95044 |
| C | -0.18561 | 1.64708  | 0.47381  |
| O | -1.29403 | 1.84501  | -0.01807 |
| O | 4.82839  | -1.06222 | -1.36524 |
| O | 3.05707  | 0.02666  | -2.12606 |
| H | -2.82604 | 0.72534  | 0.02825  |
| N | -3.75597 | 0.28588  | -0.08407 |
| C | -4.80021 | 1.37321  | -0.06454 |
| C | -6.18789 | 0.69317  | -0.20053 |
| H | -4.68421 | 1.91265  | 0.87666  |
| H | -4.57441 | 2.04549  | -0.89349 |
| H | -6.79136 | 0.88933  | 0.68816  |
| H | -6.71837 | 1.0941   | -1.0667  |
| C | -3.99167 | -0.67749 | 1.0495   |
| H | -3.18099 | -1.40615 | 1.026    |
| H | -3.93148 | -0.10278 | 1.97452  |
| C | -5.385   | -1.32228 | 0.83207  |
| H | -5.28284 | -2.40179 | 0.70259  |
| H | -6.02081 | -1.14304 | 1.70153  |
| C | -3.80184 | -0.44855 | -1.39952 |
| C | -5.22633 | -1.04211 | -1.55383 |
| H | -5.16603 | -2.12287 | -1.6984  |
| H | -5.72427 | -0.61105 | -2.42485 |
| H | -3.0276  | -1.21608 | -1.36326 |
| H | -3.55655 | 0.27124  | -2.18158 |
| N | -6.05998 | -0.77114 | -0.36298 |
| C | 1.09911  | 2.28004  | 0.21798  |
| C | 2.02365  | 1.73512  | 1.13451  |
| C | 1.49662  | 3.24528  | -0.71085 |
| C | 2.83345  | 3.64735  | -0.71649 |
| C | 3.74216  | 3.08924  | 0.19668  |
| C | 3.35266  | 2.12683  | 1.14183  |
| C | 0.07596  | 0.64785  | 1.64671  |
| H | 0.78009  | 3.66138  | -1.4122  |
| H | 3.17531  | 4.3908   | -1.42873 |
| H | 4.77861  | 3.41196  | 0.17711  |
| H | 4.06361  | 1.7069   | 1.84525  |
| N | 1.38811  | 0.79821  | 1.97324  |

|   |          |          |         |
|---|----------|----------|---------|
| O | -0.75751 | -0.07789 | 2.18132 |
| H | 1.8567   | 0.26562  | 2.69798 |

TS2-A

|                                              |              |
|----------------------------------------------|--------------|
| Sum of electronic and zero-point Energies=   | -1387.278498 |
| Sum of electronic and thermal Energies=      | -1387.252987 |
| Sum of electronic and thermal Enthalpies=    | -1387.252043 |
| Sum of electronic and thermal Free Energies= | -1387.335703 |

|   |          |          |          |
|---|----------|----------|----------|
| C | 3.12037  | -2.55853 | 0.07657  |
| C | 2.63374  | -1.51181 | -0.77805 |
| C | 1.25061  | -1.38972 | -0.52069 |
| N | 2.14436  | -3.04737 | 0.79574  |
| O | 0.96263  | -2.32764 | 0.42573  |
| N | 3.36007  | -0.80512 | -1.7242  |
| C | 4.49735  | -3.11233 | 0.22204  |
| C | 0.2192   | -0.53063 | -0.93456 |
| H | 5.20147  | -2.32409 | 0.502    |
| H | 4.50098  | -3.88903 | 0.98979  |
| H | 4.83924  | -3.54109 | -0.72414 |
| H | -0.7836  | -0.89334 | -0.73379 |
| H | -2.74546 | 0.70188  | -0.05335 |
| H | 0.3704   | -0.00507 | -1.86807 |
| O | 4.58533  | -1.05049 | -1.86673 |
| O | 2.78122  | 0.06302  | -2.42208 |
| C | -4.72988 | 1.37099  | -0.10006 |
| C | -6.13021 | 0.70931  | -0.19805 |
| H | -4.58671 | 1.91658  | 0.83404  |
| H | -4.51797 | 2.03729  | -0.93775 |
| H | -6.70807 | 0.91558  | 0.7054   |
| H | -6.67834 | 1.11514  | -1.05098 |
| C | -3.92453 | -0.68087 | 1.00199  |
| H | -3.12115 | -1.41761 | 0.96757  |
| H | -3.83997 | -0.10411 | 1.92406  |
| C | -5.32797 | -1.31518 | 0.81846  |
| H | -5.23833 | -2.39547 | 0.68525  |
| H | -5.94115 | -1.13227 | 1.70343  |
| C | -5.2228  | -1.03831 | -1.57025 |
| H | -5.18103 | -2.11942 | -1.71937 |
| H | -5.73544 | -0.59833 | -2.4284  |
| C | -3.78757 | -0.4655  | -1.44605 |
| H | -3.02427 | -1.24481 | -1.42238 |
| H | -3.5468  | 0.24513  | -2.23815 |
| N | -3.70021 | 0.27383  | -0.13831 |

|   |          |          |          |
|---|----------|----------|----------|
| N | -6.02723 | -0.75789 | -0.36045 |
| C | 2.0522   | 1.6477   | 0.97993  |
| C | 1.14338  | 1.99004  | -0.03684 |
| C | 1.49145  | 2.91394  | -1.0151  |
| C | 2.77845  | 3.46862  | -0.984   |
| C | 3.68616  | 3.09711  | 0.01725  |
| C | 3.33522  | 2.18269  | 1.02351  |
| C | 0.14995  | 0.50332  | 1.53887  |
| C | -0.11028 | 1.23476  | 0.21029  |
| H | 0.78443  | 3.18576  | -1.79352 |
| H | 3.07663  | 4.18755  | -1.74078 |
| H | 4.68176  | 3.53089  | 0.02535  |
| H | 4.03819  | 1.91592  | 1.80539  |
| N | 1.44739  | 0.75676  | 1.89378  |
| O | -1.27469 | 1.61169  | -0.14325 |
| O | -0.66387 | -0.17462 | 2.17795  |
| H | 1.919    | 0.34175  | 2.67182  |

#### IM2-A

|                                              |              |
|----------------------------------------------|--------------|
| Sum of electronic and zero-point Energies=   | -1387.294377 |
| Sum of electronic and thermal Energies=      | -1387.268943 |
| Sum of electronic and thermal Enthalpies=    | -1387.267999 |
| Sum of electronic and thermal Free Energies= | -1387.352063 |

|   |          |          |          |
|---|----------|----------|----------|
| C | -3.44455 | -2.00433 | -1.3093  |
| C | -2.48034 | -1.94061 | -0.24646 |
| C | -1.42316 | -1.18062 | -0.71746 |
| N | -3.0042  | -1.33441 | -2.34475 |
| O | -1.72653 | -0.81954 | -1.96915 |
| N | -2.58869 | -2.54894 | 1.02769  |
| C | -4.76827 | -2.68564 | -1.36874 |
| C | -0.12843 | -0.70622 | -0.17486 |
| H | -5.4337  | -2.29635 | -0.59318 |
| H | -5.22211 | -2.52276 | -2.34832 |
| H | -4.65236 | -3.75955 | -1.1988  |
| H | 0.65015  | -0.91153 | -0.9172  |
| H | 2.44459  | 0.423    | 0.39609  |
| H | 0.09539  | -1.25302 | 0.73939  |
| O | -3.61192 | -3.20833 | 1.27596  |
| O | -1.66828 | -2.40317 | 1.84771  |
| C | 4.43441  | 0.81008  | 1.05459  |
| C | 5.86079  | 0.27514  | 0.76031  |
| H | 4.31299  | 1.85605  | 0.76671  |
| H | 4.15646  | 0.69989  | 2.10453  |

|   |          |          |          |
|---|----------|----------|----------|
| H | 6.44441  | 1.01762  | 0.21082  |
| H | 6.38284  | 0.06404  | 1.69647  |
| C | 3.83442  | 0.05615  | -1.1989  |
| H | 3.04556  | -0.44291 | -1.76443 |
| H | 3.85929  | 1.10934  | -1.48492 |
| C | 5.21209  | -0.63681 | -1.36401 |
| H | 5.10801  | -1.56678 | -1.92801 |
| H | 5.8965   | 0.01457  | -1.91252 |
| C | 4.93759  | -1.93906 | 0.63428  |
| H | 4.97053  | -2.88187 | 0.08321  |
| H | 5.34379  | -2.11652 | 1.63294  |
| C | 3.47761  | -1.42208 | 0.72393  |
| H | 2.79668  | -1.98418 | 0.08213  |
| H | 3.09065  | -1.43456 | 1.74464  |
| N | 3.45722  | 0.00143  | 0.25141  |
| N | 5.81136  | -0.96088 | -0.04999 |
| C | -1.85786 | 2.37061  | 0.23633  |
| C | -1.23576 | 1.34599  | 0.96342  |
| C | -1.7122  | 1.00554  | 2.22171  |
| C | -2.82405 | 1.6936   | 2.7389   |
| C | -3.43542 | 2.70914  | 1.99671  |
| C | -2.95732 | 3.06804  | 0.72578  |
| C | -0.1611  | 1.68311  | -1.13465 |
| C | -0.03928 | 0.83005  | 0.17046  |
| H | -1.23449 | 0.22039  | 2.80066  |
| H | -3.20997 | 1.43515  | 3.72047  |
| H | -4.29332 | 3.23453  | 2.40614  |
| H | -3.42995 | 3.85962  | 0.1541   |
| N | -1.19636 | 2.56097  | -0.9997  |
| O | 1.17499  | 1.09758  | 0.78704  |
| O | 0.5999   | 1.61497  | -2.10988 |
| H | -1.45021 | 3.25963  | -1.6686  |

#### TS3-A

|                                              |              |
|----------------------------------------------|--------------|
| Sum of electronic and zero-point Energies=   | -1387.296979 |
| Sum of electronic and thermal Energies=      | -1387.271874 |
| Sum of electronic and thermal Enthalpies=    | -1387.270930 |
| Sum of electronic and thermal Free Energies= | -1387.353724 |

|   |         |          |          |
|---|---------|----------|----------|
| C | 3.59635 | -1.99874 | 1.01199  |
| C | 2.67255 | -1.71567 | -0.05096 |
| C | 1.54454 | -1.1727  | 0.54035  |
| N | 3.06865 | -1.65115 | 2.15891  |
| O | 1.77321 | -1.13206 | 1.85801  |



|   |          |          |          |
|---|----------|----------|----------|
| N | 2.87191  | -1.96834 | -1.43024 |
| C | 4.96124  | -2.59434 | 0.96826  |
| C | 0.23834  | -0.65627 | 0.06706  |
| H | 5.62777  | -1.97823 | 0.35868  |
| H | 5.36184  | -2.66738 | 1.9813   |
| H | 4.92633  | -3.59163 | 0.52102  |
| H | -0.54903 | -1.08482 | 0.69597  |
| H | 0.08373  | -0.96956 | -0.96393 |
| C | 0.05636  | 0.90937  | 0.10464  |
| O | -1.15577 | 1.25046  | -0.47398 |
| H | -2.19662 | 0.60173  | -0.29131 |
| O | 3.96251  | -2.44585 | -1.78505 |
| O | 1.96043  | -1.70756 | -2.23149 |
| N | -3.4167  | 0.03079  | -0.21976 |
| C | -4.36427 | 1.002    | -0.85913 |
| C | -5.79114 | 0.3953   | -0.80959 |
| H | -4.28931 | 1.93923  | -0.30443 |
| H | -4.0157  | 1.16708  | -1.88037 |
| H | -6.46215 | 1.04869  | -0.24716 |
| H | -6.19423 | 0.28657  | -1.81928 |
| C | -3.81913 | -0.2086  | 1.20379  |
| H | -3.08735 | -0.89215 | 1.63815  |
| H | -3.7582  | 0.74927  | 1.72357  |
| C | -5.25633 | -0.79608 | 1.20823  |
| H | -5.26288 | -1.78117 | 1.68061  |
| H | -5.92832 | -0.14672 | 1.77412  |
| C | -3.43719 | -1.26358 | -0.97417 |
| C | -4.8845  | -1.82621 | -0.92923 |
| H | -4.89493 | -2.81185 | -0.45833 |
| H | -5.28076 | -1.93221 | -1.94178 |
| H | -2.71514 | -1.92934 | -0.49769 |
| H | -3.10265 | -1.05066 | -1.99144 |
| N | -5.78703 | -0.9363  | -0.16549 |
| C | 1.2401   | 1.66996  | -0.49225 |
| C | 1.79537  | 2.50274  | 0.48911  |
| C | 1.75476  | 1.69007  | -1.78207 |
| C | 2.8349   | 2.54138  | -2.0715  |
| C | 3.38071  | 3.35823  | -1.07471 |
| C | 2.86425  | 3.3524   | 0.23044  |
| C | 0.09603  | 1.41719  | 1.58652  |
| H | 1.32874  | 1.06068  | -2.55817 |
| H | 3.24738  | 2.56664  | -3.07567 |
| H | 4.21536  | 4.01186  | -1.31079 |
| H | 3.28     | 3.98952  | 1.00495  |

|   |          |         |         |
|---|----------|---------|---------|
| N | 1.09502  | 2.33236 | 1.70195 |
| O | -0.68187 | 1.08505 | 2.48939 |
| H | 1.28267  | 2.85194 | 2.55258 |

Product

|                                              |              |
|----------------------------------------------|--------------|
| Sum of electronic and zero-point Energies=   | -1387.296498 |
| Sum of electronic and thermal Energies=      | -1387.271048 |
| Sum of electronic and thermal Enthalpies=    | -1387.270104 |
| Sum of electronic and thermal Free Energies= | -1387.354648 |

|   |          |          |          |
|---|----------|----------|----------|
| C | 3.37887  | -2.11267 | 1.30757  |
| C | 2.51452  | -1.94996 | 0.17195  |
| C | 1.43509  | -1.20397 | 0.6045   |
| N | 2.8615   | -1.50325 | 2.34505  |
| O | 1.63318  | -0.93247 | 1.8978   |
| N | 2.71995  | -2.47875 | -1.12888 |
| C | 4.67722  | -2.83178 | 1.43225  |
| C | 0.17151  | -0.71089 | -0.00358 |
| H | 5.40969  | -2.42082 | 0.73215  |
| H | 5.05537  | -2.73363 | 2.45178  |
| H | 4.5488   | -3.89179 | 1.19598  |
| H | -0.65079 | -1.00357 | 0.65811  |
| C | 0.07867  | 0.82851  | -0.22315 |
| O | -1.11103 | 1.13041  | -0.9278  |
| H | -1.94226 | 0.67025  | -0.54065 |
| H | 0.03494  | -1.19212 | -0.9709  |
| O | 3.74892  | -3.14212 | -1.33062 |
| O | 1.87369  | -2.26201 | -2.00922 |
| N | -3.45739 | 0.01519  | -0.253   |
| C | -4.41595 | 0.70522  | -1.15419 |
| C | -5.82614 | 0.05768  | -1.02467 |
| H | -4.43433 | 1.76353  | -0.87594 |
| H | -4.03359 | 0.63154  | -2.17713 |
| H | -6.57434 | 0.80736  | -0.75079 |
| H | -6.13766 | -0.39531 | -1.97057 |
| C | -3.9264  | 0.16263  | 1.14807  |
| H | -3.22309 | -0.37155 | 1.79343  |
| H | -3.88795 | 1.22362  | 1.41272  |
| C | -5.3686  | -0.40483 | 1.28624  |
| H | -5.40937 | -1.17571 | 2.06155  |
| H | -6.07506 | 0.38377  | 1.5619   |
| C | -3.43735 | -1.4292  | -0.59769 |
| C | -4.85183 | -2.04207 | -0.39346 |
| H | -4.83431 | -2.81024 | 0.38529  |

|   |          |          |          |
|---|----------|----------|----------|
| H | -5.21034 | -2.51064 | -1.3147  |
| H | -2.69667 | -1.91998 | 0.04016  |
| H | -3.10456 | -1.52233 | -1.63621 |
| N | -5.82654 | -1.00179 | 0.01057  |
| C | 1.26812  | 1.44272  | -0.9312  |
| C | 1.82775  | 2.42476  | -0.10258 |
| C | 1.80757  | 1.19716  | -2.18559 |
| C | 2.92336  | 1.94469  | -2.59928 |
| C | 3.47436  | 2.91669  | -1.7583  |
| C | 2.93199  | 3.17585  | -0.48908 |
| C | 0.08975  | 1.60021  | 1.13386  |
| H | 1.3768   | 0.44211  | -2.8361  |
| H | 3.35956  | 1.76488  | -3.57702 |
| H | 4.3383   | 3.48559  | -2.08913 |
| H | 3.36087  | 3.93387  | 0.1576   |
| N | 1.10701  | 2.50538  | 1.11204  |
| O | -0.72126 | 1.43567  | 2.05121  |
| H | 1.32131  | 3.14486  | 1.85037  |

The vinylogous Henry reaction of **1a** and **2** by one water auxiliary to activating the catalyst (Path B).

H<sub>2</sub>O

|                                              |            |
|----------------------------------------------|------------|
| Sum of electronic and zero-point Energies=   | -76.427052 |
| Sum of electronic and thermal Energies=      | -76.424215 |
| Sum of electronic and thermal Enthalpies=    | -76.423271 |
| Sum of electronic and thermal Free Energies= | -76.444714 |

|   |          |         |          |
|---|----------|---------|----------|
| O | -1.67183 | 1.37647 | -0.07598 |
| H | -0.71183 | 1.37647 | -0.07598 |
| H | -1.99228 | 2.2814  | -0.07598 |

TS1-B

|                                              |             |
|----------------------------------------------|-------------|
| Sum of electronic and zero-point Energies=   | -950.698214 |
| Sum of electronic and thermal Energies=      | -950.679253 |
| Sum of electronic and thermal Enthalpies=    | -950.678308 |
| Sum of electronic and thermal Free Energies= | -950.747442 |

|   |          |          |          |
|---|----------|----------|----------|
| C | -2.75924 | -1.3264  | -1.20351 |
| C | -1.88705 | -0.04463 | -1.25077 |
| H | -2.13756 | -2.21144 | -1.35337 |
| H | -3.51096 | -1.3046  | -1.99506 |
| H | -0.81977 | -0.26307 | -1.31936 |
| H | -2.16393 | 0.62024  | -2.07033 |

|   |          |          |          |
|---|----------|----------|----------|
| C | -2.45024 | -1.45118 | 1.17595  |
| H | -2.96762 | -1.58562 | 2.13035  |
| H | -1.7856  | -2.30738 | 1.0274   |
| C | -1.63955 | -0.1272  | 1.18818  |
| H | -1.80832 | 0.45968  | 2.09299  |
| H | -0.56694 | -0.28733 | 1.06494  |
| C | -3.5509  | 1.04736  | 0.1914   |
| H | -3.64522 | 1.64646  | 1.09876  |
| H | -3.83691 | 1.65775  | -0.66667 |
| C | -4.34586 | -0.28351 | 0.26791  |
| H | -4.84651 | -0.37334 | 1.23442  |
| H | -5.10974 | -0.30982 | -0.51232 |
| N | -3.45774 | -1.45275 | 0.09344  |
| N | -2.09875 | 0.70788  | 0.02972  |
| C | 2.51708  | -1.20443 | -0.79577 |
| C | 2.44422  | -0.07199 | 0.08533  |
| C | 2.17786  | 1.05307  | -0.72108 |
| O | 2.08457  | 0.59124  | -1.99064 |
| N | 2.29932  | -0.8334  | -2.02977 |
| N | 2.61436  | -0.06403 | 1.46164  |
| O | 2.89489  | -1.13519 | 2.05491  |
| O | 2.47707  | 1.0151   | 2.0887   |
| C | 1.93791  | 2.43076  | -0.48144 |
| H | 2.43058  | 2.80542  | 0.41335  |
| H | 2.11145  | 3.04483  | -1.36705 |
| H | 0.66208  | 2.60489  | -0.22369 |
| C | 2.79396  | -2.63773 | -0.49068 |
| H | 3.78026  | -2.74539 | -0.03059 |
| H | 2.05597  | -3.03295 | 0.2123   |
| H | 2.76253  | -3.22318 | -1.41197 |
| O | -0.59981 | 2.88936  | 0.05224  |
| H | -0.87832 | 3.49436  | -0.65172 |
| H | -1.50865 | 1.61785  | 0.00773  |

#### IM1-B

|                                              |             |
|----------------------------------------------|-------------|
| Sum of electronic and zero-point Energies=   | -950.714115 |
| Sum of electronic and thermal Energies=      | -950.693803 |
| Sum of electronic and thermal Enthalpies=    | -950.692859 |
| Sum of electronic and thermal Free Energies= | -950.766992 |

|   |          |          |          |
|---|----------|----------|----------|
| C | -2.80277 | -1.33026 | -1.25305 |
| C | -1.95545 | -0.03127 | -1.28158 |
| H | -2.16112 | -2.20044 | -1.40616 |
| H | -3.54813 | -1.31384 | -2.05118 |

|   |          |          |          |
|---|----------|----------|----------|
| H | -0.8835  | -0.22492 | -1.35014 |
| H | -2.24741 | 0.64456  | -2.08702 |
| C | -2.50657 | -1.48616 | 1.12666  |
| H | -3.02412 | -1.6401  | 2.07586  |
| H | -1.83104 | -2.32941 | 0.96848  |
| C | -1.70946 | -0.15538 | 1.16435  |
| H | -1.88353 | 0.41659  | 2.07729  |
| H | -0.63578 | -0.29914 | 1.03198  |
| C | -3.64679 | 1.01042  | 0.18194  |
| H | -3.74746 | 1.58539  | 1.104    |
| H | -3.93457 | 1.63785  | -0.6634  |
| C | -4.4179  | -0.33396 | 0.22442  |
| H | -4.92612 | -0.44932 | 1.18412  |
| H | -5.17312 | -0.35786 | -0.56397 |
| N | -3.50783 | -1.48475 | 0.03787  |
| N | -2.18705 | 0.69109  | 0.01675  |
| C | 2.42261  | -1.1718  | -0.83236 |
| C | 2.36117  | -0.0847  | 0.10946  |
| C | 2.20198  | 1.12017  | -0.66817 |
| O | 2.10789  | 0.68769  | -1.98925 |
| N | 2.26936  | -0.74264 | -2.05346 |
| N | 2.45102  | -0.15323 | 1.45651  |
| O | 2.65331  | -1.27177 | 2.04695  |
| O | 2.32309  | 0.91561  | 2.14724  |
| C | 2.16586  | 2.44607  | -0.39021 |
| H | 2.29414  | 2.79277  | 0.62529  |
| H | 2.12599  | 3.16385  | -1.20297 |
| H | 0.15191  | 2.85294  | -0.09143 |
| C | 2.63825  | -2.62823 | -0.5855  |
| H | 3.60609  | -2.79386 | -0.10347 |
| H | 1.86757  | -3.02953 | 0.07799  |
| H | 2.61407  | -3.17026 | -1.53371 |
| O | -0.78263 | 3.09857  | 0.08478  |
| H | -1.03806 | 3.66731  | -0.65741 |
| H | -1.65138 | 1.58914  | 0.01149  |

#### IM1'-B

|                                              |              |
|----------------------------------------------|--------------|
| Sum of electronic and zero-point Energies=   | -1463.716177 |
| Sum of electronic and thermal Energies=      | -1463.685954 |
| Sum of electronic and thermal Enthalpies=    | -1463.685010 |
| Sum of electronic and thermal Free Energies= | -1463.782790 |

|   |         |          |          |
|---|---------|----------|----------|
| C | 6.22879 | -1.68677 | -1.09488 |
| C | 5.12564 | -1.72594 | -0.00358 |

|   |          |          |          |
|---|----------|----------|----------|
| H | 5.88934  | -2.2107  | -1.99092 |
| H | 7.13377  | -2.18088 | -0.73496 |
| H | 4.2017   | -2.18838 | -0.35426 |
| H | 5.45181  | -2.22683 | 0.90941  |
| N | 6.5716   | -0.29827 | -1.46645 |
| C | 5.34795  | 0.38095  | -1.94266 |
| H | 5.61076  | 1.39358  | -2.2557  |
| H | 4.97571  | -0.15811 | -2.8165  |
| C | 4.26117  | 0.42885  | -0.83699 |
| H | 4.03163  | 1.44577  | -0.51458 |
| H | 3.33576  | -0.06963 | -1.12948 |
| C | 7.07551  | 0.40552  | -0.268   |
| C | 6.0332   | 0.38629  | 0.88021  |
| H | 5.73538  | 1.38656  | 1.19839  |
| H | 6.37362  | -0.17779 | 1.75028  |
| H | 7.31135  | 1.43488  | -0.54634 |
| H | 8.00003  | -0.07808 | 0.0544   |
| N | 4.79932  | -0.30402 | 0.36366  |
| H | 4.06951  | -0.29537 | 1.11094  |
| O | 2.81547  | -0.10604 | 2.34447  |
| H | 2.46932  | -0.94355 | 2.68605  |
| H | 2.05618  | 0.31817  | 1.89043  |
| O | 0.89633  | 1.32026  | 0.84083  |
| C | -0.32213 | 1.33719  | 0.99384  |
| C | -1.0692  | 0.47455  | 2.06286  |
| N | -2.37461 | 0.84898  | 1.98963  |
| C | -0.90811 | -1.28129 | -0.78654 |
| H | -0.01227 | -1.66722 | -0.31317 |
| H | -0.82197 | -0.5534  | -1.57875 |
| C | -2.11964 | -1.75196 | -0.41348 |
| O | -2.20378 | -2.71363 | 0.59533  |
| N | -3.57936 | -3.05507 | 0.83644  |
| C | -3.48648 | -1.49552 | -0.8009  |
| N | -3.89365 | -0.62876 | -1.75453 |
| O | -5.13911 | -0.48596 | -2.02706 |
| O | -3.02409 | 0.06325  | -2.38793 |
| C | -4.30822 | -2.34428 | 0.0224   |
| C | -5.79388 | -2.48714 | 0.05307  |
| H | -6.26799 | -1.52756 | 0.27737  |
| H | -6.17047 | -2.8211  | -0.91779 |
| H | -6.07771 | -3.21452 | 0.81708  |
| C | -2.57983 | 1.8053   | 0.97504  |
| C | -3.77108 | 2.39595  | 0.58544  |
| C | -1.35625 | 2.13278  | 0.35249  |

|   |          |          |          |
|---|----------|----------|----------|
| C | -1.30667 | 3.07598  | -0.67778 |
| C | -2.50011 | 3.67605  | -1.08293 |
| C | -3.71023 | 3.33277  | -0.45851 |
| H | -4.71133 | 2.14355  | 1.064    |
| H | -0.36128 | 3.32359  | -1.15042 |
| H | -2.49708 | 4.40765  | -1.88396 |
| H | -4.62965 | 3.80782  | -0.78717 |
| O | -0.55569 | -0.33877 | 2.82536  |
| H | -3.11477 | 0.44293  | 2.55175  |

TS2-B

|                                              |              |
|----------------------------------------------|--------------|
| Sum of electronic and zero-point Energies=   | -1463.708099 |
| Sum of electronic and thermal Energies=      | -1463.679427 |
| Sum of electronic and thermal Enthalpies=    | -1463.678482 |
| Sum of electronic and thermal Free Energies= | -1463.771580 |

|   |          |          |          |
|---|----------|----------|----------|
| C | 6.05974  | -1.69884 | -1.03759 |
| C | 4.98964  | -1.66108 | 0.08547  |
| H | 5.65181  | -2.16936 | -1.9353  |
| H | 6.92363  | -2.28368 | -0.71157 |
| H | 4.05936  | -2.15475 | -0.20156 |
| H | 5.34748  | -2.09109 | 1.02278  |
| C | 5.36676  | 0.43026  | -1.92008 |
| H | 5.70384  | 1.44971  | -2.12468 |
| H | 5.04833  | -0.01787 | -2.86401 |
| C | 4.18827  | 0.44279  | -0.91222 |
| H | 3.86425  | 1.45197  | -0.65345 |
| H | 3.32691  | -0.12902 | -1.26194 |
| C | 5.88613  | 0.4944   | 0.87759  |
| H | 5.60625  | 1.53808  | 1.03404  |
| H | 6.1329   | 0.04347  | 1.84081  |
| C | 7.01565  | 0.3289   | -0.1718  |
| H | 7.42029  | 1.30706  | -0.44619 |
| H | 7.83109  | -0.27417 | 0.23781  |
| N | 6.51712  | -0.33838 | -1.39376 |
| N | 4.6659   | -0.21599 | 0.35438  |
| C | -4.07964 | -2.3518  | 0.05176  |
| C | -3.21904 | -1.49032 | -0.71035 |
| C | -1.96687 | -1.48976 | -0.05748 |
| O | -2.10442 | -2.31758 | 1.01728  |
| N | -3.43614 | -2.84493 | 1.07701  |
| N | -3.52487 | -0.84121 | -1.89608 |
| O | -4.67889 | -0.95764 | -2.38254 |
| O | -2.64187 | -0.15276 | -2.46487 |

|   |          |          |          |
|---|----------|----------|----------|
| C | -0.74762 | -0.81344 | -0.22358 |
| H | -0.55336 | -0.4013  | -1.20516 |
| H | 0.09496  | -1.24896 | 0.30449  |
| H | 1.87771  | 0.52941  | 1.73416  |
| C | -5.50747 | -2.71858 | -0.17128 |
| H | -6.13495 | -1.82264 | -0.19322 |
| H | -5.62544 | -3.23063 | -1.13034 |
| H | -5.84777 | -3.37727 | 0.63113  |
| O | 2.66227  | 0.19339  | 2.24529  |
| H | 2.33987  | -0.57934 | 2.73445  |
| H | 3.90683  | -0.15149 | 1.07332  |
| C | -3.89034 | 2.46658  | 0.60635  |
| C | -2.71799 | 1.79508  | 0.93219  |
| C | -1.55881 | 1.89479  | 0.14307  |
| C | -1.5444  | 2.71212  | -0.98267 |
| C | -2.71548 | 3.40022  | -1.32618 |
| C | -3.87259 | 3.26957  | -0.5437  |
| H | -4.78025 | 2.37988  | 1.22233  |
| H | -0.64709 | 2.8019   | -1.58844 |
| H | -2.73028 | 4.03829  | -2.2044  |
| H | -4.77341 | 3.80697  | -0.82525 |
| C | -0.5059  | 1.05715  | 0.77713  |
| O | 0.7463   | 1.26949  | 0.69938  |
| N | -2.46397 | 0.96832  | 2.04357  |
| C | -1.17154 | 0.52954  | 2.06413  |
| O | -0.64117 | -0.14162 | 2.95526  |
| H | -3.13785 | 0.75832  | 2.77155  |

#### IM2-B

|                                              |              |
|----------------------------------------------|--------------|
| Sum of electronic and zero-point Energies=   | -1463.722027 |
| Sum of electronic and thermal Energies=      | -1463.693519 |
| Sum of electronic and thermal Enthalpies=    | -1463.692575 |
| Sum of electronic and thermal Free Energies= | -1463.785730 |

|   |         |          |          |
|---|---------|----------|----------|
| C | 6.271   | -1.64675 | -1.06447 |
| C | 5.18007 | -1.66542 | 0.04012  |
| H | 5.90361 | -2.13983 | -1.96708 |
| H | 7.16    | -2.18169 | -0.72343 |
| H | 4.26287 | -2.16168 | -0.2811  |
| H | 5.5278  | -2.1238  | 0.96731  |
| C | 5.47463 | 0.45229  | -1.92456 |
| H | 5.76752 | 1.47791  | -2.15931 |
| H | 5.15069 | -0.02751 | -2.85058 |
| C | 4.32164 | 0.44687  | -0.88767 |



|   |          |          |          |
|---|----------|----------|----------|
| H | 4.00764  | 1.45109  | -0.59953 |
| H | 3.44999  | -0.11391 | -1.22854 |
| C | 6.03366  | 0.48519  | 0.88813  |
| H | 5.72436  | 1.50886  | 1.10561  |
| H | 6.31749  | -0.00637 | 1.8202   |
| C | 7.14356  | 0.41386  | -0.19317 |
| H | 7.4732   | 1.41989  | -0.46126 |
| H | 8.00771  | -0.13603 | 0.18611  |
| N | 6.66226  | -0.2657  | -1.41451 |
| N | 4.82602  | -0.23772 | 0.35467  |
| C | -4.02241 | -2.14294 | 0.06395  |
| C | -3.18858 | -1.21248 | -0.64513 |
| C | -1.93679 | -1.23514 | -0.03572 |
| O | -2.012   | -2.16458 | 0.93634  |
| N | -3.32609 | -2.72244 | 1.00941  |
| N | -3.55918 | -0.4591  | -1.77938 |
| O | -4.73102 | -0.54197 | -2.19057 |
| O | -2.70152 | 0.24798  | -2.33417 |
| C | -0.66825 | -0.47212 | -0.14623 |
| H | -0.5043  | -0.16097 | -1.17677 |
| H | 0.1446   | -1.11505 | 0.19709  |
| H | 1.97184  | 0.35613  | 1.67161  |
| C | -5.46415 | -2.48232 | -0.11866 |
| H | -6.0801  | -1.58374 | -0.02504 |
| H | -5.63789 | -2.9034  | -1.11273 |
| H | -5.76784 | -3.20846 | 0.63809  |
| O | 2.76233  | 0.02456  | 2.20923  |
| H | 2.4608   | -0.78851 | 2.63905  |
| H | 4.06548  | -0.21166 | 1.07744  |
| C | -3.7145  | 2.5034   | 0.76819  |
| C | -2.57485 | 1.74647  | 1.01273  |
| C | -1.4367  | 1.8145   | 0.19634  |
| C | -1.38767 | 2.73777  | -0.84105 |
| C | -2.51721 | 3.53667  | -1.09214 |
| C | -3.67191 | 3.39901  | -0.31205 |
| H | -4.59648 | 2.41504  | 1.39517  |
| H | -0.50001 | 2.82689  | -1.46137 |
| H | -2.49931 | 4.2569   | -1.90472 |
| H | -4.54595 | 4.0053   | -0.53144 |
| C | -0.44726 | 0.75347  | 0.66484  |
| O | 0.86181  | 1.07608  | 0.68163  |
| N | -2.33841 | 0.8377   | 2.06772  |
| C | -1.07372 | 0.33008  | 2.02153  |
| O | -0.54865 | -0.39186 | 2.87676  |

|   |          |         |         |
|---|----------|---------|---------|
| H | -2.98293 | 0.66939 | 2.83276 |
|---|----------|---------|---------|

TS3-B

|                                              |              |
|----------------------------------------------|--------------|
| Sum of electronic and zero-point Energies=   | -1463.724188 |
| Sum of electronic and thermal Energies=      | -1463.696399 |
| Sum of electronic and thermal Enthalpies=    | -1463.695455 |
| Sum of electronic and thermal Free Energies= | -1463.786097 |

|   |          |          |          |
|---|----------|----------|----------|
| C | 5.52844  | 1.80972  | -0.41557 |
| C | 4.37171  | 0.94559  | -0.98357 |
| H | 5.1376   | 2.73706  | 0.00915  |
| H | 6.22689  | 2.07428  | -1.21276 |
| H | 3.40031  | 1.43612  | -0.89739 |
| H | 4.53354  | 0.66323  | -2.02575 |
| N | 6.27538  | 1.08623  | 0.63771  |
| C | 5.35508  | 0.78241  | 1.75533  |
| H | 5.90504  | 0.1975   | 2.49616  |
| H | 5.04834  | 1.72012  | 2.22423  |
| C | 4.10807  | 0.00042  | 1.26405  |
| H | 3.96741  | -0.94277 | 1.79526  |
| H | 3.19045  | 0.58686  | 1.33739  |
| C | 6.75852  | -0.19335 | 0.06842  |
| C | 5.57715  | -1.10063 | -0.36523 |
| H | 5.49296  | -1.99998 | 0.24796  |
| H | 5.63712  | -1.39465 | -1.41476 |
| H | 7.36601  | -0.70445 | 0.81864  |
| H | 7.39972  | 0.03357  | -0.78649 |
| N | 4.30607  | -0.32408 | -0.18711 |
| H | 3.4691   | -0.92217 | -0.53922 |
| O | 2.3086   | -1.81954 | -1.02969 |
| H | 2.06623  | -1.56696 | -1.93209 |
| H | 1.24551  | -1.85019 | -0.37954 |
| O | 0.30281  | -1.94915 | 0.32419  |
| C | -0.85157 | -1.31567 | -0.15452 |
| C | -1.33959 | -2.02361 | -1.46423 |
| N | -2.5626  | -2.56536 | -1.22301 |
| C | -3.0086  | -2.2982  | 0.08789  |
| C | -2.0398  | -1.54775 | 0.76796  |
| C | -0.54104 | 0.1983   | -0.42691 |
| C | -1.70689 | 1.03163  | -0.81328 |
| C | -2.47502 | 2.00897  | -0.20695 |
| C | -3.48147 | 2.38741  | -1.15994 |

|   |          |          |          |
|---|----------|----------|----------|
| O | -2.20858 | 0.83893  | -2.03752 |
| N | -3.33106 | 1.69168  | -2.25933 |
| N | -2.29752 | 2.54714  | 1.09249  |
| O | -3.09698 | 3.4149   | 1.47849  |
| O | -1.35897 | 2.13734  | 1.79306  |
| H | -0.09872 | 0.60537  | 0.48071  |
| H | 0.19578  | 0.24192  | -1.23623 |
| C | -4.5781  | 3.38997  | -1.05303 |
| H | -5.245   | 3.13614  | -0.22429 |
| H | -4.16803 | 4.38466  | -0.85801 |
| H | -5.14926 | 3.41096  | -1.98339 |
| C | -4.19902 | -2.69421 | 0.68479  |
| C | -2.25301 | -1.18111 | 2.09027  |
| C | -3.44859 | -1.57012 | 2.7177   |
| C | -4.40634 | -2.31448 | 2.01975  |
| H | -4.93665 | -3.27593 | 0.14088  |
| H | -1.50882 | -0.60588 | 2.63291  |
| H | -3.63033 | -1.29083 | 3.75104  |
| H | -5.32635 | -2.60831 | 2.51655  |
| O | -0.70871 | -2.10917 | -2.52335 |
| H | -3.07562 | -3.11325 | -1.9053  |

#### Product

|                                              |              |
|----------------------------------------------|--------------|
| Sum of electronic and zero-point Energies=   | -1463.722027 |
| Sum of electronic and thermal Energies=      | -1463.693519 |
| Sum of electronic and thermal Enthalpies=    | -1463.692575 |
| Sum of electronic and thermal Free Energies= | -1463.785730 |

|   |         |          |          |
|---|---------|----------|----------|
| C | 6.271   | -1.64675 | -1.06447 |
| C | 5.18007 | -1.66542 | 0.04012  |
| H | 5.90361 | -2.13983 | -1.96708 |
| H | 7.16    | -2.18169 | -0.72343 |
| H | 4.26287 | -2.16168 | -0.2811  |
| H | 5.5278  | -2.1238  | 0.96731  |
| C | 5.47463 | 0.45229  | -1.92456 |
| H | 5.76752 | 1.47791  | -2.15931 |
| H | 5.15069 | -0.02751 | -2.85058 |
| C | 4.32164 | 0.44687  | -0.88767 |
| H | 4.00764 | 1.45109  | -0.59953 |
| H | 3.44999 | -0.11391 | -1.22854 |
| C | 6.03366 | 0.48519  | 0.88813  |
| H | 5.72436 | 1.50886  | 1.10561  |
| H | 6.31749 | -0.00637 | 1.8202   |
| C | 7.14356 | 0.41386  | -0.19317 |

|   |          |          |          |
|---|----------|----------|----------|
| H | 7.4732   | 1.41989  | -0.46126 |
| H | 8.00771  | -0.13603 | 0.18611  |
| N | 6.66226  | -0.2657  | -1.41451 |
| N | 4.82602  | -0.23772 | 0.35467  |
| C | -4.02241 | -2.14294 | 0.06395  |
| C | -3.18858 | -1.21248 | -0.64513 |
| C | -1.93679 | -1.23514 | -0.03572 |
| O | -2.012   | -2.16458 | 0.93634  |
| N | -3.32609 | -2.72244 | 1.00941  |
| N | -3.55918 | -0.4591  | -1.77938 |
| O | -4.73102 | -0.54197 | -2.19057 |
| O | -2.70152 | 0.24798  | -2.33417 |
| C | -0.66825 | -0.47212 | -0.14623 |
| H | -0.5043  | -0.16097 | -1.17677 |
| H | 0.1446   | -1.11505 | 0.19709  |
| H | 1.97184  | 0.35613  | 1.67161  |
| C | -5.46415 | -2.48232 | -0.11866 |
| H | -6.0801  | -1.58374 | -0.02504 |
| H | -5.63789 | -2.9034  | -1.11273 |
| H | -5.76784 | -3.20846 | 0.63809  |
| O | 2.76233  | 0.02456  | 2.20923  |
| H | 2.4608   | -0.78851 | 2.63905  |
| H | 4.06548  | -0.21166 | 1.07744  |
| C | -3.7145  | 2.5034   | 0.76819  |
| C | -2.57485 | 1.74647  | 1.01273  |
| C | -1.4367  | 1.8145   | 0.19634  |
| C | -1.38767 | 2.73777  | -0.84105 |
| C | -2.51721 | 3.53667  | -1.09214 |
| C | -3.67191 | 3.39901  | -0.31205 |
| H | -4.59648 | 2.41504  | 1.39517  |
| H | -0.50001 | 2.82689  | -1.46137 |
| H | -2.49931 | 4.2569   | -1.90472 |
| H | -4.54595 | 4.0053   | -0.53144 |
| C | -0.44726 | 0.75347  | 0.66484  |
| O | 0.86181  | 1.07608  | 0.68163  |
| N | -2.33841 | 0.8377   | 2.06772  |
| C | -1.07372 | 0.33008  | 2.02153  |
| O | -0.54865 | -0.39186 | 2.87676  |
| H | -2.98293 | 0.66939  | 2.83276  |

The three water molecules auxiliary without catalyst (Path C).

3H<sub>2</sub>O

Sum of electronic and zero-point Energies= -229.284549

|                                              |             |
|----------------------------------------------|-------------|
| Sum of electronic and thermal Energies=      | -229.275965 |
| Sum of electronic and thermal Enthalpies=    | -229.275021 |
| Sum of electronic and thermal Free Energies= | -229.317771 |

|   |          |          |          |
|---|----------|----------|----------|
| H | -2.3152  | -0.87219 | -1.29211 |
| O | -3.1995  | -1.27694 | -1.3874  |
| H | -3.08013 | -2.19768 | -1.11062 |
| H | -4.32711 | -0.46811 | -0.27219 |
| O | -4.942   | -0.03278 | 0.36531  |
| H | -5.54475 | 0.49427  | -0.17898 |
| O | -3.37539 | 1.59311  | 1.99615  |
| H | -3.96563 | 1.04382  | 1.43051  |
| H | -3.96599 | 2.05088  | 2.61112  |

#### TS1-C

|                                              |             |
|----------------------------------------------|-------------|
| Sum of electronic and zero-point Energies=   | -758.354420 |
| Sum of electronic and thermal Energies=      | -758.338151 |
| Sum of electronic and thermal Enthalpies=    | -758.337206 |
| Sum of electronic and thermal Free Energies= | -758.398878 |

|   |          |          |          |
|---|----------|----------|----------|
| H | -1.23878 | -1.94754 | 0.08984  |
| C | -0.28795 | -1.74517 | 1.25591  |
| C | 0.81241  | -1.14784 | 0.65332  |
| C | 1.15386  | 0.181    | 0.27058  |
| C | 2.40967  | 0.10029  | -0.42585 |
| N | 2.82445  | -1.13481 | -0.48107 |
| O | 1.83273  | -1.93448 | 0.20087  |
| N | 0.40373  | 1.30077  | 0.50573  |
| C | 3.22681  | 1.18627  | -1.03987 |
| H | 3.49491  | 1.93329  | -0.28764 |
| H | 4.13762  | 0.76477  | -1.47047 |
| H | 2.66073  | 1.69576  | -1.82478 |
| H | -0.15284 | -2.77527 | 1.58144  |
| H | -0.91595 | -1.11173 | 1.87283  |
| O | 0.79157  | 2.42961  | 0.09778  |
| O | -0.69225 | 1.18166  | 1.13747  |
| H | -2.21899 | 1.88879  | 0.38375  |
| O | -3.12332 | 2.01485  | 0.02552  |
| H | -3.03252 | 2.66571  | -0.68576 |
| H | -3.57358 | 0.47737  | -0.57982 |
| O | -3.82563 | -0.42316 | -0.91868 |
| H | -4.59956 | -0.69477 | -0.40247 |
| O | -1.9742  | -2.15019 | -0.76173 |
| H | -2.72973 | -1.43505 | -0.78078 |

|   |          |          |          |
|---|----------|----------|----------|
| H | -2.38851 | -3.01672 | -0.60318 |
|---|----------|----------|----------|

#### IM1-C

|                                              |             |
|----------------------------------------------|-------------|
| Sum of electronic and zero-point Energies=   | -758.358355 |
| Sum of electronic and thermal Energies=      | -758.341554 |
| Sum of electronic and thermal Enthalpies=    | -758.340609 |
| Sum of electronic and thermal Free Energies= | -758.405685 |

|   |          |          |          |
|---|----------|----------|----------|
| H | 1.36275  | 1.99944  | -0.24039 |
| C | 0.05316  | 1.75885  | 1.49442  |
| C | -0.90139 | 1.14954  | 0.7531   |
| C | -1.13834 | -0.20048 | 0.29532  |
| C | -2.34515 | -0.15669 | -0.49286 |
| N | -2.82608 | 1.05211  | -0.54011 |
| O | -1.95313 | 1.89866  | 0.22757  |
| N | -0.36418 | -1.27059 | 0.54638  |
| C | -3.04748 | -1.2613  | -1.2092  |
| H | -3.32493 | -2.05723 | -0.5127  |
| H | -3.94804 | -0.87416 | -1.69118 |
| H | -2.39535 | -1.70058 | -1.96959 |
| H | -0.02454 | 2.82121  | 1.7008   |
| H | 0.84212  | 1.18052  | 1.95225  |
| O | -0.63063 | -2.42457 | 0.06631  |
| O | 0.68283  | -1.11968 | 1.29058  |
| H | 2.13286  | -1.59623 | 0.55237  |
| O | 3.03415  | -1.74008 | 0.15326  |
| H | 2.93874  | -2.46017 | -0.48948 |
| H | 3.4644   | -0.56924 | -0.47341 |
| O | 3.8073   | 0.32851  | -0.9575  |
| H | 4.59267  | 0.66014  | -0.489   |
| O | 1.99946  | 2.0987   | -0.9813  |
| H | 3.07301  | 1.06465  | -0.93186 |
| H | 2.37336  | 2.98918  | -0.88774 |

#### IM1'-C

|                                              |              |
|----------------------------------------------|--------------|
| Sum of electronic and zero-point Energies=   | -1271.360944 |
| Sum of electronic and thermal Energies=      | -1271.334626 |
| Sum of electronic and thermal Enthalpies=    | -1271.333682 |
| Sum of electronic and thermal Free Energies= | -1271.419817 |

|   |          |         |         |
|---|----------|---------|---------|
| C | -0.67018 | 3.17076 | 0.02844 |
| C | -1.24165 | 1.94755 | 0.53588 |
| C | -0.23046 | 1.34475 | 1.37641 |
| N | 0.54075  | 3.33976 | 0.47633 |

|   |          |          |          |
|---|----------|----------|----------|
| O | 0.85544  | 2.22256  | 1.32064  |
| N | -2.46578 | 1.45385  | 0.28894  |
| C | -1.26997 | 4.18778  | -0.88426 |
| C | -0.14142 | 0.21518  | 2.10942  |
| H | -2.18097 | 4.60778  | -0.44888 |
| H | -0.5535  | 4.99354  | -1.05975 |
| H | -1.54087 | 3.73411  | -1.84169 |
| H | -0.97114 | -0.47425 | 2.15828  |
| H | 0.76729  | 0.00106  | 2.66105  |
| O | -3.29321 | 2.04539  | -0.48989 |
| O | -2.81458 | 0.34446  | 0.85736  |
| C | 2.62306  | -0.1819  | -0.99466 |
| C | 2.66481  | -1.21244 | -0.03088 |
| C | 3.8226   | -1.44814 | 0.71641  |
| C | 4.93462  | -0.63606 | 0.48654  |
| C | 4.87672  | 0.3829   | -0.47767 |
| C | 3.72095  | 0.62749  | -1.23676 |
| C | 0.52478  | -1.08826 | -1.11082 |
| C | 1.36375  | -1.85806 | -0.03615 |
| H | 3.84656  | -2.24224 | 1.45609  |
| H | 5.84773  | -0.79121 | 1.05119  |
| H | 5.75123  | 1.00445  | -0.64475 |
| H | 3.68998  | 1.41886  | -1.97807 |
| N | 1.35841  | -0.14068 | -1.61604 |
| O | 0.93829  | -2.82091 | 0.59492  |
| O | -0.63381 | -1.32933 | -1.43116 |
| H | 1.09421  | 0.52271  | -2.3366  |
| H | -0.80226 | -3.29921 | 0.80307  |
| H | -3.95978 | -0.5254  | 0.00267  |
| O | -4.58061 | -1.17548 | -0.43604 |
| H | -4.86695 | -0.75997 | -1.26431 |
| H | -3.8742  | -2.36526 | -0.68326 |
| O | -3.35927 | -3.29644 | -0.81704 |
| H | -2.8874  | -3.27009 | -1.66733 |
| O | -1.69237 | -3.64836 | 1.03753  |
| H | -2.64927 | -3.41926 | -0.05722 |
| H | -1.9691  | -3.15056 | 1.82293  |

#### TS2-C

|                                              |              |
|----------------------------------------------|--------------|
| Sum of electronic and zero-point Energies=   | -1271.352166 |
| Sum of electronic and thermal Energies=      | -1271.327205 |
| Sum of electronic and thermal Enthalpies=    | -1271.326261 |
| Sum of electronic and thermal Free Energies= | -1271.407641 |

|   |          |          |          |
|---|----------|----------|----------|
| C | 3.94929  | -1.50809 | -0.93612 |
| C | 2.63592  | -1.71114 | -0.39355 |
| C | 1.77424  | -0.82115 | -1.07327 |
| N | 3.92076  | -0.58125 | -1.85789 |
| O | 2.55994  | -0.144   | -1.95723 |
| N | 2.26446  | -2.63406 | 0.56951  |
| C | 5.23913  | -2.17114 | -0.59002 |
| C | 0.42206  | -0.46414 | -0.99158 |
| H | 5.17851  | -3.24759 | -0.77264 |
| H | 6.04436  | -1.74869 | -1.19481 |
| H | 5.47084  | -2.02738 | 0.46908  |
| H | -0.24659 | -1.16855 | -0.5141  |
| H | 0.03914  | 0.07246  | -1.85285 |
| O | 3.1319   | -3.4084  | 1.05024  |
| O | 1.06565  | -2.67967 | 0.94297  |
| C | 2.06306  | 1.68871  | 1.16151  |
| C | 1.22047  | 2.0356   | 0.0892   |
| C | 1.6324   | 2.97352  | -0.85168 |
| C | 2.90123  | 3.55431  | -0.70956 |
| C | 3.73289  | 3.19033  | 0.35736  |
| C | 3.32407  | 2.24842  | 1.31568  |
| C | 0.14794  | 0.48447  | 1.55736  |
| C | -0.03504 | 1.25502  | 0.23337  |
| H | 0.98465  | 3.24542  | -1.68002 |
| H | 3.24253  | 4.28892  | -1.43228 |
| H | 4.71299  | 3.64814  | 0.45297  |
| H | 3.96447  | 1.97763  | 2.14928  |
| N | 1.41137  | 0.75731  | 1.99389  |
| O | -1.18455 | 1.61241  | -0.1743  |
| O | -0.703   | -0.19638 | 2.13925  |
| H | 1.80085  | 0.38445  | 2.85258  |
| H | -2.31614 | -0.01905 | -0.50727 |
| H | 0.11229  | -2.62427 | 2.34093  |
| O | -0.52375 | -2.47036 | 3.09264  |
| H | -0.08919 | -1.84957 | 3.69802  |
| H | -1.70631 | -1.92891 | 2.59186  |
| O | -2.63913 | -1.49199 | 2.11478  |
| H | -2.5772  | -0.55159 | 2.35571  |
| O | -2.85547 | -0.81714 | -0.31669 |
| H | -2.73323 | -1.25213 | 1.10791  |
| H | -2.52606 | -1.505   | -0.91658 |

Product

Sum of electronic and zero-point Energies= -1271.394266



|                                              |              |
|----------------------------------------------|--------------|
| Sum of electronic and thermal Energies=      | -1271.368293 |
| Sum of electronic and thermal Enthalpies=    | -1271.367349 |
| Sum of electronic and thermal Free Energies= | -1271.451289 |

|   |          |          |          |
|---|----------|----------|----------|
| C | 0.60156  | 3.21037  | -0.1896  |
| C | 1.13876  | 1.88934  | -0.35668 |
| C | 0.11027  | 1.10626  | -0.84761 |
| N | -0.65682 | 3.22007  | -0.55197 |
| O | -0.96259 | 1.89123  | -0.96534 |
| N | 2.47095  | 1.48228  | -0.08902 |
| C | 1.25166  | 4.4606   | 0.29152  |
| C | -0.03274 | -0.3167  | -1.25935 |
| H | 2.10498  | 4.71442  | -0.34331 |
| H | 0.5301   | 5.2797   | 0.27019  |
| H | 1.62236  | 4.33132  | 1.31173  |
| H | 0.96003  | -0.7621  | -1.31086 |
| H | -0.48383 | -0.33788 | -2.25686 |
| O | 3.25056  | 2.311    | 0.39948  |
| O | 2.80528  | 0.31616  | -0.35842 |
| C | -0.92604 | -1.21166 | -0.34515 |
| C | -2.36698 | -0.75609 | -0.22745 |
| C | -2.65158 | -0.47894 | 1.11415  |
| C | -3.34939 | -0.60349 | -1.19527 |
| C | -4.62365 | -0.16891 | -0.79639 |
| C | -4.88994 | 0.10714  | 0.54969  |
| C | -3.90178 | -0.04431 | 1.53401  |
| C | -0.45925 | -1.1591  | 1.14937  |
| H | -3.13739 | -0.8139  | -2.23929 |
| H | -5.40647 | -0.04378 | -1.53757 |
| H | -5.87953 | 0.44475  | 0.84312  |
| H | -4.10688 | 0.167    | 2.57833  |
| N | -1.50106 | -0.72024 | 1.89578  |
| O | -0.8925  | -2.54277 | -0.82917 |
| O | 0.65339  | -1.47517 | 1.58521  |
| H | -1.45678 | -0.61979 | 2.90505  |
| H | 0.03299  | -2.8409  | -1.03085 |
| H | 4.4909   | -0.53918 | 0.23191  |
| O | 5.04587  | -1.32269 | 0.40137  |
| H | 5.49342  | -1.14482 | 1.24202  |
| H | 3.63707  | -2.46782 | 0.63178  |
| O | 2.84573  | -3.04301 | 0.73148  |
| H | 2.12276  | -2.45352 | 1.03131  |
| O | 1.49367  | -3.67428 | -1.53351 |
| H | 2.10036  | -3.45644 | -0.78041 |

|   |         |          |          |
|---|---------|----------|----------|
| H | 1.86372 | -3.22268 | -2.30614 |
|---|---------|----------|----------|

Microsolvent models

One-water

TS1-1W

|                                              |             |
|----------------------------------------------|-------------|
| Sum of electronic and zero-point Energies=   | -950.704509 |
| Sum of electronic and thermal Energies=      | -950.684573 |
| Sum of electronic and thermal Enthalpies=    | -950.683629 |
| Sum of electronic and thermal Free Energies= | -950.755442 |

|   |          |          |          |
|---|----------|----------|----------|
| C | 1.52077  | 0.2467   | 0.89623  |
| C | 2.73244  | 0.80366  | 1.69823  |
| H | 0.78928  | 1.02714  | 0.67075  |
| H | 1.01454  | -0.5627  | 1.42879  |
| H | 2.59235  | 1.86603  | 1.91409  |
| H | 2.83642  | 0.27726  | 2.65055  |
| N | 3.99134  | 0.64332  | 0.93749  |
| C | 3.85311  | 1.35143  | -0.3553  |
| C | 2.66053  | 0.78399  | -1.18057 |
| H | 2.98877  | 0.35726  | -2.13202 |
| H | 1.90266  | 1.54523  | -1.38555 |
| H | 4.78997  | 1.24036  | -0.90738 |
| H | 3.70513  | 2.41507  | -0.15153 |
| C | 4.19063  | -0.79746 | 0.66076  |
| H | 5.12105  | -0.91076 | 0.09839  |
| H | 4.30683  | -1.3191  | 1.61416  |
| C | 2.99149  | -1.38648 | -0.14023 |
| H | 3.30611  | -1.79031 | -1.10618 |
| H | 2.47725  | -2.17614 | 0.41383  |
| N | 2.01232  | -0.299   | -0.3968  |
| H | 0.92802  | -0.76861 | -1.08207 |
| C | -0.12501 | -1.16985 | -1.82288 |
| C | -1.20035 | -1.39844 | -0.93845 |
| C | -2.13818 | -0.5763  | -0.27268 |
| C | -2.89587 | -1.43462 | 0.59698  |
| N | -2.48051 | -2.66789 | 0.49201  |
| O | -1.41624 | -2.65792 | -0.48146 |
| N | -2.25664 | 0.78849  | -0.41624 |
| C | -4.00601 | -1.10035 | 1.53462  |
| H | -4.84741 | -0.66266 | 0.99023  |
| H | -4.33976 | -2.00412 | 2.04869  |
| H | -3.67241 | -0.36717 | 2.27422  |
| H | 0.22918  | -2.07185 | -2.32355 |
| H | -0.25099 | -0.30907 | -2.47629 |

|   |          |         |          |
|---|----------|---------|----------|
| O | -3.14889 | 1.40445 | 0.23676  |
| O | -1.4715  | 1.40244 | -1.18197 |
| H | -3.0446  | 3.27574 | 0.09975  |
| O | -3.07011 | 4.25436 | 0.10902  |
| H | -2.34542 | 4.52371 | -0.47313 |

IM1-1W

|                                              |             |
|----------------------------------------------|-------------|
| Sum of electronic and zero-point Energies=   | -950.715004 |
| Sum of electronic and thermal Energies=      | -950.694594 |
| Sum of electronic and thermal Enthalpies=    | -950.693650 |
| Sum of electronic and thermal Free Energies= | -950.766935 |

|   |          |          |          |
|---|----------|----------|----------|
| C | -1.53933 | 0.30176  | -0.87272 |
| C | -2.75154 | 0.8341   | -1.68026 |
| H | -0.83434 | 1.08754  | -0.59785 |
| H | -1.00538 | -0.49831 | -1.38715 |
| H | -2.62585 | 1.89916  | -1.88553 |
| H | -2.82526 | 0.31067  | -2.63572 |
| N | -4.01926 | 0.64319  | -0.94304 |
| C | -3.92633 | 1.34483  | 0.35579  |
| C | -2.76084 | 0.79207  | 1.21833  |
| H | -3.10322 | 0.32539  | 2.14307  |
| H | -2.01079 | 1.54824  | 1.4537   |
| H | -4.8746  | 1.22213  | 0.88324  |
| H | -3.77852 | 2.40949  | 0.16362  |
| C | -4.21239 | -0.80109 | -0.69029 |
| H | -5.14781 | -0.93073 | -0.14216 |
| H | -4.30705 | -1.31287 | -1.65009 |
| C | -3.03044 | -1.40165 | 0.11716  |
| H | -3.34137 | -1.8191  | 1.07607  |
| H | -2.47484 | -2.15716 | -0.44037 |
| N | -2.07206 | -0.2784  | 0.41275  |
| H | -1.27161 | -0.64563 | 0.95844  |
| C | 0.50002  | -1.17016 | 2.1349   |
| C | 1.3265   | -1.38924 | 1.08485  |
| C | 2.16103  | -0.56    | 0.24802  |
| C | 2.7897   | -1.4424  | -0.70201 |
| N | 2.41184  | -2.67482 | -0.51437 |
| O | 1.49523  | -2.68319 | 0.59517  |
| N | 2.30674  | 0.77525  | 0.3575   |
| C | 3.75178  | -1.12543 | -1.79814 |
| H | 4.65457  | -0.65806 | -1.39555 |
| H | 4.02817  | -2.0428  | -2.32285 |
| H | 3.30761  | -0.42405 | -2.51013 |

|   |         |          |          |
|---|---------|----------|----------|
| H | 0.00463 | -2.00866 | 2.61339  |
| H | 0.39809 | -0.17861 | 2.55182  |
| O | 3.09525 | 1.41689  | -0.43498 |
| O | 1.65397 | 1.41371  | 1.25074  |
| H | 3.09271 | 3.20931  | -0.1202  |
| O | 3.16216 | 4.1886   | -0.05501 |
| H | 2.62224 | 4.42277  | 0.71309  |

Three-water

TS1-3W

|                                              |              |
|----------------------------------------------|--------------|
| Sum of electronic and zero-point Energies=   | -1103.563745 |
| Sum of electronic and thermal Energies=      | -1103.538196 |
| Sum of electronic and thermal Enthalpies=    | -1103.537252 |
| Sum of electronic and thermal Free Energies= | -1103.622694 |

|   |          |          |          |
|---|----------|----------|----------|
| C | -1.85324 | -1.16506 | -4.02026 |
| C | -3.34782 | -0.92444 | -3.66207 |
| H | -1.55665 | -2.2053  | -3.86304 |
| H | -1.18473 | -0.52336 | -3.44044 |
| H | -3.82796 | -1.86147 | -3.36866 |
| H | -3.43126 | -0.22755 | -2.82417 |
| N | -4.08914 | -0.3652  | -4.81572 |
| C | -4.02504 | -1.34169 | -5.9271  |
| C | -2.55019 | -1.67788 | -6.29363 |
| H | -2.33046 | -1.46418 | -7.34289 |
| H | -2.31019 | -2.726   | -6.09695 |
| H | -4.54683 | -0.91372 | -6.78691 |
| H | -4.55919 | -2.24646 | -5.62593 |
| C | -3.41143 | 0.87821  | -5.24832 |
| H | -3.97983 | 1.31151  | -6.07527 |
| H | -3.43492 | 1.58653  | -4.41617 |
| C | -1.94409 | 0.59548  | -5.68774 |
| H | -1.78861 | 0.80138  | -6.75005 |
| H | -1.22187 | 1.18132  | -5.11251 |
| N | -1.64939 | -0.84233 | -5.45736 |
| H | -0.35123 | -1.09243 | -5.75753 |
| C | 0.92165  | -1.33709 | -6.1349  |
| C | 1.71037  | -1.56437 | -4.90665 |
| C | 2.11635  | -2.68238 | -4.19939 |
| C | 2.87413  | -2.20753 | -3.07687 |
| N | 2.92163  | -0.89907 | -3.10252 |
| O | 2.18317  | -0.49768 | -4.2629  |
| N | 1.82356  | -4.01758 | -4.53927 |
| C | 3.5517   | -2.96432 | -1.98788 |

|   |          |          |          |
|---|----------|----------|----------|
| H | 4.30059  | -3.64288 | -2.40585 |
| H | 4.03867  | -2.26803 | -1.3025  |
| H | 2.82632  | -3.56761 | -1.43478 |
| H | 1.21008  | -0.37741 | -6.56688 |
| H | 0.93965  | -2.24788 | -6.74122 |
| O | 2.25599  | -4.92229 | -3.80441 |
| O | 1.14612  | -4.2331  | -5.55954 |
| H | 2.04561  | -6.87984 | -3.92175 |
| O | 2.07307  | -7.85136 | -3.84816 |
| H | 1.44214  | -8.06729 | -3.14572 |
| H | 0.23625  | -5.73891 | -6.51189 |
| O | -0.18575 | -6.3728  | -7.11796 |
| H | -1.11705 | -6.39201 | -6.85254 |
| H | 0.62043  | -7.97982 | -6.65118 |
| O | 1.09421  | -8.77568 | -6.32997 |
| H | 1.44415  | -8.50505 | -5.45439 |

#### IM1-3W

|                                              |              |
|----------------------------------------------|--------------|
| Sum of electronic and zero-point Energies=   | -1103.575774 |
| Sum of electronic and thermal Energies=      | -1103.549838 |
| Sum of electronic and thermal Enthalpies=    | -1103.548893 |
| Sum of electronic and thermal Free Energies= | -1103.635297 |

|   |          |          |          |
|---|----------|----------|----------|
| C | -2.25049 | -0.13616 | 1.03292  |
| C | -3.41821 | -0.78686 | 1.83282  |
| H | -1.33032 | -0.71607 | 1.10302  |
| H | -2.05141 | 0.88714  | 1.35581  |
| H | -3.0736  | -1.69394 | 2.33162  |
| H | -3.78124 | -0.0947  | 2.59875  |
| N | -4.54524 | -1.1385  | 0.94716  |
| C | -4.0562  | -2.08374 | -0.0763  |
| C | -2.89335 | -1.4677  | -0.90509 |
| H | -3.13473 | -1.39654 | -1.96532 |
| H | -1.96353 | -2.02883 | -0.79156 |
| H | -4.88881 | -2.34701 | -0.73278 |
| H | -3.71919 | -2.99362 | 0.42584  |
| C | -5.00972 | 0.08866  | 0.26746  |
| H | -5.85038 | -0.17289 | -0.38288 |
| H | -5.37658 | 0.78338  | 1.02354  |
| C | -3.87186 | 0.74268  | -0.56727 |
| H | -4.10379 | 0.77943  | -1.62913 |
| H | -3.63309 | 1.75114  | -0.22148 |
| N | -2.63094 | -0.07799 | -0.41186 |
| H | -1.88913 | 0.30692  | -0.91138 |

|   |          |          |          |
|---|----------|----------|----------|
| C | -0.57577 | 0.88977  | -1.89986 |
| C | 0.26976  | 1.62534  | -1.10571 |
| C | 1.32614  | 1.32216  | -0.18598 |
| C | 1.75317  | 2.57837  | 0.38102  |
| N | 1.05358  | 3.56525  | -0.10822 |
| O | 0.12103  | 2.98705  | -1.04579 |
| N | 1.77946  | 0.07927  | 0.11074  |
| C | 2.82624  | 2.84892  | 1.37979  |
| H | 3.79087  | 2.49263  | 1.00785  |
| H | 2.88849  | 3.92204  | 1.57216  |
| H | 2.61758  | 2.32615  | 2.31743  |
| H | -1.14512 | 1.45234  | -2.64441 |
| H | -0.23062 | -0.09846 | -2.2049  |
| O | 2.71781  | -0.07254 | 0.95643  |
| O | 1.24934  | -0.93207 | -0.44641 |
| H | 4.55972  | -0.26369 | 0.46843  |
| O | 5.4993   | -0.44308 | 0.25495  |
| H | 5.96928  | -0.341   | 1.09593  |
| H | 2.05438  | -2.60715 | -0.2077  |
| O | 2.43279  | -3.51325 | -0.25779 |
| H | 2.23802  | -3.9202  | 0.59882  |
| H | 4.26094  | -3.31151 | -0.40029 |
| O | 5.23106  | -3.18388 | -0.47607 |
| H | 5.37735  | -2.25025 | -0.21746 |

Six-water

TS1-6W

|                                              |              |
|----------------------------------------------|--------------|
| Sum of electronic and zero-point Energies=   | -1332.850827 |
| Sum of electronic and thermal Energies=      | -1332.816160 |
| Sum of electronic and thermal Enthalpies=    | -1332.815216 |
| Sum of electronic and thermal Free Energies= | -1332.922091 |

|   |          |          |          |
|---|----------|----------|----------|
| C | -1.14852 | -1.99676 | 1.02962  |
| C | -1.90909 | -3.06671 | 1.86769  |
| H | -0.08736 | -2.23815 | 0.92225  |
| H | -1.23405 | -0.9997  | 1.47031  |
| H | -1.20515 | -3.77932 | 2.30518  |
| H | -2.46116 | -2.5943  | 2.68431  |
| N | -2.87552 | -3.80902 | 1.02703  |
| C | -2.14196 | -4.3809  | -0.12575 |
| C | -1.52891 | -3.25687 | -1.00881 |
| H | -2.00626 | -3.2014  | -1.99071 |
| H | -0.45383 | -3.39265 | -1.15496 |
| H | -2.83275 | -4.99255 | -0.71195 |

|   |          |          |          |
|---|----------|----------|----------|
| H | -1.35905 | -5.03713 | 0.26319  |
| C | -3.88    | -2.85059 | 0.51314  |
| H | -4.55291 | -3.39087 | -0.15777 |
| H | -4.47007 | -2.47756 | 1.35409  |
| C | -3.19441 | -1.66831 | -0.23444 |
| H | -3.5867  | -1.54423 | -1.24725 |
| H | -3.31308 | -0.72404 | 0.30372  |
| N | -1.73936 | -1.95145 | -0.33217 |
| H | -1.07999 | -0.96597 | -1.05512 |
| C | -0.42458 | -0.11154 | -1.83121 |
| C | 0.02694  | 0.9542   | -1.02451 |
| C | 1.1267   | 1.16293  | -0.16204 |
| C | 0.93996  | 2.45078  | 0.44694  |
| N | -0.16786 | 2.99053  | 0.01598  |
| O | -0.74667 | 2.06394  | -0.91592 |
| N | 2.15841  | 0.27858  | 0.06171  |
| C | 1.78991  | 3.17673  | 1.43264  |
| H | 2.79154  | 3.33683  | 1.02462  |
| H | 1.33692  | 4.14138  | 1.66988  |
| H | 1.89381  | 2.59041  | 2.34981  |
| H | -1.16956 | 0.18824  | -2.56934 |
| H | 0.36992  | -0.74353 | -2.22277 |
| O | 3.0915   | 0.59544  | 0.84818  |
| O | 2.14031  | -0.84137 | -0.51576 |
| H | 4.86938  | 1.01873  | 0.21074  |
| O | 5.77057  | 1.19992  | -0.11704 |
| H | 6.23478  | 1.59903  | 0.63357  |
| H | 3.49071  | -2.08297 | -0.09734 |
| O | 4.15875  | -2.79551 | -0.02299 |
| H | 4.15254  | -3.05273 | 0.91061  |
| H | 5.76861  | -1.96315 | -0.37169 |
| O | 6.60146  | -1.47941 | -0.56093 |
| H | 6.37559  | -0.53819 | -0.40597 |
| O | -3.73551 | 1.99724  | -1.2917  |
| H | -2.76962 | 1.96271  | -1.17973 |
| H | -4.0633  | 1.20911  | -0.83272 |
| O | -1.71255 | 5.36504  | 0.68409  |
| H | -1.16695 | 4.59501  | 0.4135   |
| H | -1.5173  | 6.05727  | 0.03581  |
| O | -4.31338 | 4.35645  | 0.20975  |
| H | -4.12941 | 3.55587  | -0.32375 |
| H | -3.42711 | 4.73159  | 0.40067  |

IM1-6W

|                                              |              |
|----------------------------------------------|--------------|
| Sum of electronic and zero-point Energies=   | -1332.863740 |
| Sum of electronic and thermal Energies=      | -1332.829017 |
| Sum of electronic and thermal Enthalpies=    | -1332.828072 |
| Sum of electronic and thermal Free Energies= | -1332.934357 |

|   |          |          |          |
|---|----------|----------|----------|
| C | -1.41353 | -1.77325 | 1.09206  |
| C | -2.14538 | -2.90674 | 1.85714  |
| H | -0.35815 | -1.98916 | 0.92026  |
| H | -1.50994 | -0.80146 | 1.57836  |
| H | -1.4692  | -3.74619 | 2.03251  |
| H | -2.48891 | -2.53959 | 2.82636  |
| N | -3.31139 | -3.40206 | 1.09636  |
| C | -2.84202 | -3.98955 | -0.17505 |
| C | -1.996   | -2.97447 | -0.98567 |
| H | -2.37852 | -2.81162 | -1.99428 |
| H | -0.94144 | -3.24769 | -1.04077 |
| H | -3.71658 | -4.30215 | -0.74959 |
| H | -2.24607 | -4.87746 | 0.04574  |
| C | -4.20539 | -2.26505 | 0.79675  |
| H | -5.10222 | -2.64216 | 0.30124  |
| H | -4.50524 | -1.80775 | 1.74196  |
| C | -3.50278 | -1.21931 | -0.1103  |
| H | -3.92647 | -1.17489 | -1.11476 |
| H | -3.49499 | -0.21893 | 0.32544  |
| N | -2.06684 | -1.65364 | -0.26082 |
| H | -1.55371 | -0.95129 | -0.81442 |
| C | -0.07194 | 0.14782  | -2.24698 |
| C | 0.28574  | 0.93637  | -1.21848 |
| C | 1.23935  | 0.84903  | -0.13985 |
| C | 1.10497  | 2.05724  | 0.62983  |
| N | 0.18456  | 2.82112  | 0.12016  |
| O | -0.34636 | 2.16627  | -1.03808 |
| N | 2.06997  | -0.16478 | 0.08095  |
| C | 1.84362  | 2.49912  | 1.84818  |
| H | 2.91697  | 2.54804  | 1.64597  |
| H | 1.48885  | 3.48431  | 2.15789  |
| H | 1.69274  | 1.78853  | 2.66575  |
| H | -0.83182 | 0.48436  | -2.94372 |
| H | 0.42557  | -0.7967  | -2.41204 |
| O | 2.88646  | -0.15094 | 1.0617   |
| O | 2.03307  | -1.1717  | -0.69596 |
| H | 4.57512  | 0.50647  | 0.79065  |
| O | 5.49854  | 0.80144  | 0.63083  |
| H | 5.88128  | 0.92593  | 1.51164  |



|   |          |          |          |
|---|----------|----------|----------|
| H | 3.41387  | -2.34051 | -0.69669 |
| O | 4.12368  | -3.00286 | -0.85737 |
| H | 4.04021  | -3.64694 | -0.13947 |
| H | 5.71408  | -2.08509 | -0.67223 |
| O | 6.53274  | -1.55531 | -0.56579 |
| H | 6.22757  | -0.72369 | -0.14614 |
| O | -3.21802 | 2.38471  | -1.52338 |
| H | -2.2728  | 2.22957  | -1.34364 |
| H | -3.67143 | 1.60093  | -1.17699 |
| O | -0.93125 | 5.44277  | 0.48445  |
| H | -0.50039 | 4.56487  | 0.37086  |
| H | -0.64737 | 5.9643   | -0.2809  |
| O | -3.63096 | 4.63657  | 0.17876  |
| H | -3.54571 | 3.85873  | -0.41099 |
| H | -2.71242 | 4.96771  | 0.27843  |

The first step for DABCO catalyzes directly the vinylogous Henry reaction of **1a** and **2** in CH<sub>3</sub>OH.

**2**

|                                              |             |
|----------------------------------------------|-------------|
| Sum of electronic and zero-point Energies=   | -529.103355 |
| Sum of electronic and thermal Energies=      | -529.094135 |
| Sum of electronic and thermal Enthalpies=    | -529.093191 |
| Sum of electronic and thermal Free Energies= | -529.138030 |

|   |          |          |          |
|---|----------|----------|----------|
| C | -1.1401  | -0.74977 | -0.00001 |
| C | -0.00421 | 0.12669  | -0.00002 |
| C | 1.10736  | -0.68684 | -0.00001 |
| N | -0.73668 | -1.99708 | 0.       |
| O | 0.6827   | -1.95143 | -0.00001 |
| N | 0.00333  | 1.55427  | -0.00001 |
| C | -2.60007 | -0.43309 | 0.00001  |
| C | 2.57333  | -0.45079 | 0.00003  |
| H | -2.86421 | 0.16093  | -0.87895 |
| H | -3.17095 | -1.36358 | -0.00001 |
| H | -2.86418 | 0.16087  | 0.87901  |
| H | 2.86434  | 0.13265  | 0.87821  |
| H | 3.09862  | -1.40764 | -0.00025 |
| H | 2.8643   | 0.1332   | -0.8778  |
| O | -1.08712 | 2.13461  | 0.00003  |
| O | 1.10288  | 2.12258  | -0.00003 |

DABCO

|                                            |             |
|--------------------------------------------|-------------|
| Sum of electronic and zero-point Energies= | -345.187531 |
| Sum of electronic and thermal Energies=    | -345.181234 |

|                                              |             |
|----------------------------------------------|-------------|
| Sum of electronic and thermal Enthalpies=    | -345.180290 |
| Sum of electronic and thermal Free Energies= | -345.217838 |

|   |          |          |          |
|---|----------|----------|----------|
| C | -0.78284 | 1.37853  | -0.14177 |
| C | 0.78288  | 1.37848  | -0.14202 |
| H | -1.18609 | 1.79416  | -1.07252 |
| H | -1.18566 | 1.97537  | 0.68478  |
| H | 1.1859   | 1.79481  | -1.07257 |
| H | 1.18598  | 1.97464  | 0.68488  |
| N | -1.28869 | 0.00021  | 0.00059  |
| C | -0.78354 | -0.81231 | -1.12223 |
| H | -1.18623 | -1.82633 | -1.01609 |
| H | -1.18743 | -0.39548 | -2.0522  |
| C | 0.78224  | -0.812   | -1.12333 |
| H | 1.18552  | -1.82592 | -1.01849 |
| H | 1.18463  | -0.39438 | -2.0536  |
| N | 1.28869  | 0.00003  | -0.00075 |
| C | 0.78356  | -0.5667  | 1.26422  |
| H | 1.18624  | -1.5811  | 1.36678  |
| H | 1.18731  | 0.03104  | 2.08964  |
| C | -0.78231 | -0.56613 | 1.26524  |
| H | -1.18563 | -1.58015 | 1.36902  |
| H | -1.18451 | 0.03248  | 2.09078  |

#### TS1

|                                              |             |
|----------------------------------------------|-------------|
| Sum of electronic and zero-point Energies=   | -874.277897 |
| Sum of electronic and thermal Energies=      | -874.261532 |
| Sum of electronic and thermal Enthalpies=    | -874.260588 |
| Sum of electronic and thermal Free Energies= | -874.323469 |

|   |          |          |          |
|---|----------|----------|----------|
| C | 3.20921  | -0.70673 | 0.56683  |
| C | 2.37674  | 0.12944  | -0.25309 |
| C | 1.55706  | -0.73469 | -1.01337 |
| N | 2.94338  | -1.96692 | 0.34941  |
| O | 1.90705  | -1.99641 | -0.65229 |
| N | 2.3418   | 1.50939  | -0.2826  |
| C | 4.25435  | -0.3302  | 1.56171  |
| C | 0.48078  | -0.55818 | -1.90817 |
| H | 3.82394  | 0.29008  | 2.35284  |
| H | 4.68305  | -1.2316  | 2.00486  |
| H | 5.04874  | 0.24863  | 1.08235  |
| H | 0.24806  | -1.4482  | -2.49452 |
| H | -0.63426 | -0.36932 | -1.15387 |
| H | 0.51359  | 0.36644  | -2.48005 |

|   |          |          |          |
|---|----------|----------|----------|
| O | 3.12991  | 2.16812  | 0.44726  |
| O | 1.51285  | 2.08563  | -1.03502 |
| N | -1.76891 | -0.17469 | -0.43795 |
| C | -1.49918 | -0.59384 | 0.96295  |
| C | -2.80121 | -0.41775 | 1.79583  |
| H | -1.16197 | -1.63342 | 0.94475  |
| H | -0.68363 | 0.02776  | 1.3416   |
| H | -3.15657 | -1.38443 | 2.16174  |
| H | -2.61538 | 0.22176  | 2.66254  |
| C | -2.88564 | -0.97971 | -0.99811 |
| H | -3.01531 | -0.6936  | -2.04512 |
| H | -2.58933 | -2.03123 | -0.96148 |
| C | -4.16685 | -0.70828 | -0.15705 |
| H | -4.93927 | -0.2409  | -0.77318 |
| H | -4.57106 | -1.64475 | 0.2357   |
| C | -2.13003 | 1.26624  | -0.46198 |
| C | -3.38045 | 1.4799   | 0.44186  |
| H | -4.1865  | 1.94921  | -0.12795 |
| H | -3.13974 | 2.13283  | 1.28478  |
| H | -2.32469 | 1.54361  | -1.50132 |
| H | -1.26477 | 1.83387  | -0.1087  |
| N | -3.87655 | 0.19327  | 0.98127  |

#### IM1

|                                              |             |
|----------------------------------------------|-------------|
| Sum of electronic and zero-point Energies=   | -874.286889 |
| Sum of electronic and thermal Energies=      | -874.269691 |
| Sum of electronic and thermal Enthalpies=    | -874.268747 |
| Sum of electronic and thermal Free Energies= | -874.335144 |

|   |          |          |          |
|---|----------|----------|----------|
| C | 3.04923  | -0.59339 | 0.76684  |
| C | 2.33987  | 0.13084  | -0.25534 |
| C | 1.71199  | -0.85921 | -1.09691 |
| N | 2.90499  | -1.87982 | 0.61569  |
| O | 2.07476  | -2.08646 | -0.54373 |
| N | 2.26354  | 1.47041  | -0.41441 |
| C | 3.86659  | -0.07136 | 1.90177  |
| C | 0.91581  | -0.82563 | -2.1926  |
| H | 3.26323  | 0.57675  | 2.54355  |
| H | 4.25141  | -0.90513 | 2.49346  |
| H | 4.70624  | 0.5224   | 1.52989  |
| H | 0.59717  | -1.75401 | -2.65491 |
| H | -0.94103 | -0.56091 | -0.99661 |
| H | 0.66116  | 0.11734  | -2.65407 |
| O | 2.87076  | 2.26458  | 0.38745  |

|   |          |          |          |
|---|----------|----------|----------|
| O | 1.57069  | 1.94943  | -1.37728 |
| C | -1.44622 | -0.50074 | 1.02231  |
| C | -2.73485 | -0.19782 | 1.82885  |
| H | -1.10205 | -1.52897 | 1.14176  |
| H | -0.62923 | 0.18149  | 1.26039  |
| H | -3.11355 | -1.10794 | 2.29859  |
| H | -2.51545 | 0.52469  | 2.61749  |
| C | -2.9337  | -1.18084 | -0.82469 |
| H | -3.05833 | -1.09687 | -1.90516 |
| H | -2.65464 | -2.20533 | -0.5731  |
| C | -4.17187 | -0.68171 | -0.03469 |
| H | -4.90752 | -0.2471  | -0.71483 |
| H | -4.64348 | -1.51726 | 0.48686  |
| C | -3.26974 | 1.52925  | 0.24307  |
| H | -4.07818 | 1.98242  | -0.33439 |
| H | -2.93412 | 2.25626  | 0.9857   |
| C | -2.10213 | 1.14269  | -0.70075 |
| H | -2.36691 | 1.21852  | -1.75643 |
| H | -1.19431 | 1.71971  | -0.51841 |
| N | -1.77255 | -0.30355 | -0.43571 |
| N | -3.79883 | 0.34883  | 0.95894  |

The first step for DABCO catalyzes directly the vinylogous Henry reaction of **1a** and **2** in THF.

**2**

|                                              |             |
|----------------------------------------------|-------------|
| Sum of electronic and zero-point Energies=   | -529.105086 |
| Sum of electronic and thermal Energies=      | -529.095727 |
| Sum of electronic and thermal Enthalpies=    | -529.094783 |
| Sum of electronic and thermal Free Energies= | -529.140265 |

|   |          |          |          |
|---|----------|----------|----------|
| C | -1.1401  | -0.74977 | -0.00001 |
| C | -0.00421 | 0.12669  | -0.00002 |
| C | 1.10736  | -0.68684 | -0.00001 |
| N | -0.73668 | -1.99708 | 0.       |
| O | 0.6827   | -1.95143 | -0.00001 |
| N | 0.00333  | 1.55427  | -0.00001 |
| C | -2.60007 | -0.43309 | 0.00001  |
| C | 2.57333  | -0.45079 | 0.00003  |
| H | -2.86421 | 0.16093  | -0.87895 |
| H | -3.17095 | -1.36358 | -0.00001 |
| H | -2.86418 | 0.16087  | 0.87901  |
| H | 2.86434  | 0.13265  | 0.87821  |
| H | 3.09862  | -1.40764 | -0.00025 |
| H | 2.8643   | 0.1332   | -0.8778  |

|   |          |         |          |
|---|----------|---------|----------|
| O | -1.08712 | 2.13461 | 0.00003  |
| O | 1.10288  | 2.12258 | -0.00003 |

#### DABCO

|                                              |             |
|----------------------------------------------|-------------|
| Sum of electronic and zero-point Energies=   | -345.183109 |
| Sum of electronic and thermal Energies=      | -345.176748 |
| Sum of electronic and thermal Enthalpies=    | -345.175804 |
| Sum of electronic and thermal Free Energies= | -345.213514 |

|   |          |          |          |
|---|----------|----------|----------|
| C | -0.78284 | 1.37853  | -0.14177 |
| C | 0.78288  | 1.37848  | -0.14202 |
| H | -1.18609 | 1.79416  | -1.07252 |
| H | -1.18566 | 1.97537  | 0.68478  |
| H | 1.1859   | 1.79481  | -1.07257 |
| H | 1.18598  | 1.97464  | 0.68488  |
| N | -1.28869 | 0.00021  | 0.00059  |
| C | -0.78354 | -0.81231 | -1.12223 |
| H | -1.18623 | -1.82633 | -1.01609 |
| H | -1.18743 | -0.39548 | -2.0522  |
| C | 0.78224  | -0.812   | -1.12333 |
| H | 1.18552  | -1.82592 | -1.01849 |
| H | 1.18463  | -0.39438 | -2.0536  |
| N | 1.28869  | 0.00003  | -0.00075 |
| C | 0.78356  | -0.5667  | 1.26422  |
| H | 1.18624  | -1.5811  | 1.36678  |
| H | 1.18731  | 0.03104  | 2.08964  |
| C | -0.78231 | -0.56613 | 1.26524  |
| H | -1.18563 | -1.58015 | 1.36902  |
| H | -1.18451 | 0.03248  | 2.09078  |

#### TS1

|                                              |             |
|----------------------------------------------|-------------|
| Sum of electronic and zero-point Energies=   | -874.272544 |
| Sum of electronic and thermal Energies=      | -874.256004 |
| Sum of electronic and thermal Enthalpies=    | -874.255060 |
| Sum of electronic and thermal Free Energies= | -874.319247 |

|   |         |          |          |
|---|---------|----------|----------|
| C | 3.20921 | -0.70673 | 0.56683  |
| C | 2.37674 | 0.12944  | -0.25309 |
| C | 1.55706 | -0.73469 | -1.01337 |
| N | 2.94338 | -1.96692 | 0.34941  |
| O | 1.90705 | -1.99641 | -0.65229 |
| N | 2.3418  | 1.50939  | -0.2826  |
| C | 4.25435 | -0.3302  | 1.56171  |
| C | 0.48078 | -0.55818 | -1.90817 |

|   |          |          |          |
|---|----------|----------|----------|
| H | 3.82394  | 0.29008  | 2.35284  |
| H | 4.68305  | -1.2316  | 2.00486  |
| H | 5.04874  | 0.24863  | 1.08235  |
| H | 0.24806  | -1.4482  | -2.49452 |
| H | -0.63426 | -0.36932 | -1.15387 |
| H | 0.51359  | 0.36644  | -2.48005 |
| O | 3.12991  | 2.16812  | 0.44726  |
| O | 1.51285  | 2.08563  | -1.03502 |
| N | -1.76891 | -0.17469 | -0.43795 |
| C | -1.49918 | -0.59384 | 0.96295  |
| C | -2.80121 | -0.41775 | 1.79583  |
| H | -1.16197 | -1.63342 | 0.94475  |
| H | -0.68363 | 0.02776  | 1.3416   |
| H | -3.15657 | -1.38443 | 2.16174  |
| H | -2.61538 | 0.22176  | 2.66254  |
| C | -2.88564 | -0.97971 | -0.99811 |
| H | -3.01531 | -0.6936  | -2.04512 |
| H | -2.58933 | -2.03123 | -0.96148 |
| C | -4.16685 | -0.70828 | -0.15705 |
| H | -4.93927 | -0.2409  | -0.77318 |
| H | -4.57106 | -1.64475 | 0.2357   |
| C | -2.13003 | 1.26624  | -0.46198 |
| C | -3.38045 | 1.4799   | 0.44186  |
| H | -4.1865  | 1.94921  | -0.12795 |
| H | -3.13974 | 2.13283  | 1.28478  |
| H | -2.32469 | 1.54361  | -1.50132 |
| H | -1.26477 | 1.83387  | -0.1087  |
| N | -3.87655 | 0.19327  | 0.98127  |

#### IM1

|                                              |             |
|----------------------------------------------|-------------|
| Sum of electronic and zero-point Energies=   | -874.273827 |
| Sum of electronic and thermal Energies=      | -874.256631 |
| Sum of electronic and thermal Enthalpies=    | -874.255687 |
| Sum of electronic and thermal Free Energies= | -874.321865 |

|   |         |          |          |
|---|---------|----------|----------|
| C | 3.04923 | -0.59339 | 0.76684  |
| C | 2.33987 | 0.13084  | -0.25534 |
| C | 1.71199 | -0.85921 | -1.09691 |
| N | 2.90499 | -1.87982 | 0.61569  |
| O | 2.07476 | -2.08646 | -0.54373 |
| N | 2.26354 | 1.47041  | -0.41441 |
| C | 3.86659 | -0.07136 | 1.90177  |
| C | 0.91581 | -0.82563 | -2.1926  |

|   |          |          |          |
|---|----------|----------|----------|
| H | 3.26323  | 0.57675  | 2.54355  |
| H | 4.25141  | -0.90513 | 2.49346  |
| H | 4.70624  | 0.5224   | 1.52989  |
| H | 0.59717  | -1.75401 | -2.65491 |
| H | -0.94103 | -0.56091 | -0.99661 |
| H | 0.66116  | 0.11734  | -2.65407 |
| O | 2.87076  | 2.26458  | 0.38745  |
| O | 1.57069  | 1.94943  | -1.37728 |
| C | -1.44622 | -0.50074 | 1.02231  |
| C | -2.73485 | -0.19782 | 1.82885  |
| H | -1.10205 | -1.52897 | 1.14176  |
| H | -0.62923 | 0.18149  | 1.26039  |
| H | -3.11355 | -1.10794 | 2.29859  |
| H | -2.51545 | 0.52469  | 2.61749  |
| C | -2.9337  | -1.18084 | -0.82469 |
| H | -3.05833 | -1.09687 | -1.90516 |
| H | -2.65464 | -2.20533 | -0.5731  |
| C | -4.17187 | -0.68171 | -0.03469 |
| H | -4.90752 | -0.2471  | -0.71483 |
| H | -4.64348 | -1.51726 | 0.48686  |
| C | -3.26974 | 1.52925  | 0.24307  |
| H | -4.07818 | 1.98242  | -0.33439 |
| H | -2.93412 | 2.25626  | 0.9857   |
| C | -2.10213 | 1.14269  | -0.70075 |
| H | -2.36691 | 1.21852  | -1.75643 |
| H | -1.19431 | 1.71971  | -0.51841 |
| N | -1.77255 | -0.30355 | -0.43571 |
| N | -3.79883 | 0.34883  | 0.95894  |
